# Supplementary material for: Autism-associated protein POGZ controls ESCs and ESC neural induction by association with esBAF
Source: PubMed Central journal article supplement (PMC9161502; doi:10.1186/s13229-022-00502-9), 2022-06-01

# Supplementary Figure 1

**A**

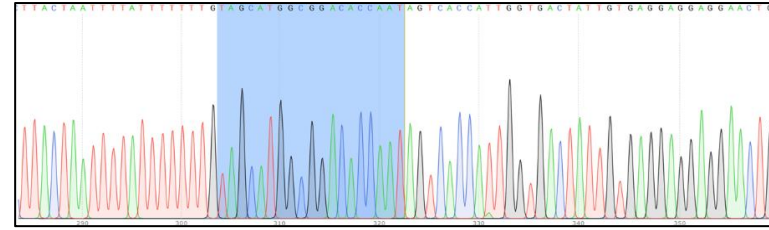

Control: TAGCATGGCGGACACCGAC\*\*\*\*CTGTTTATGG\*\*AATGTGAGGAGGAGGA  
**Mut2 (+7bp)**: TAGCATGGCGGACACCAATAGTCAACCATTGGTGA**CT**AATGTGAGGAGGAGGA

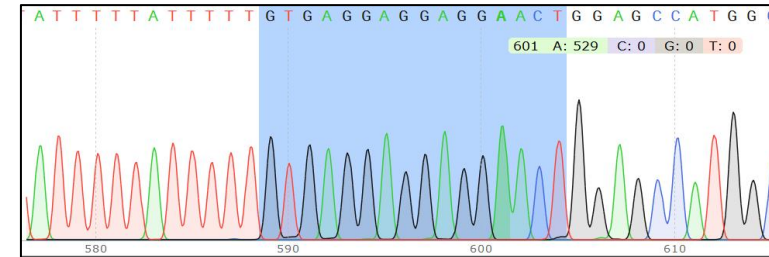

Control: GTAGCATGGCGGACACCGACCTGTTTATGGAATGTGAGG  
**Mut3 (+284bp)**: GTAGCATGGCGGACACCGACCTGTTTATG +...+GTGAGG

**B**

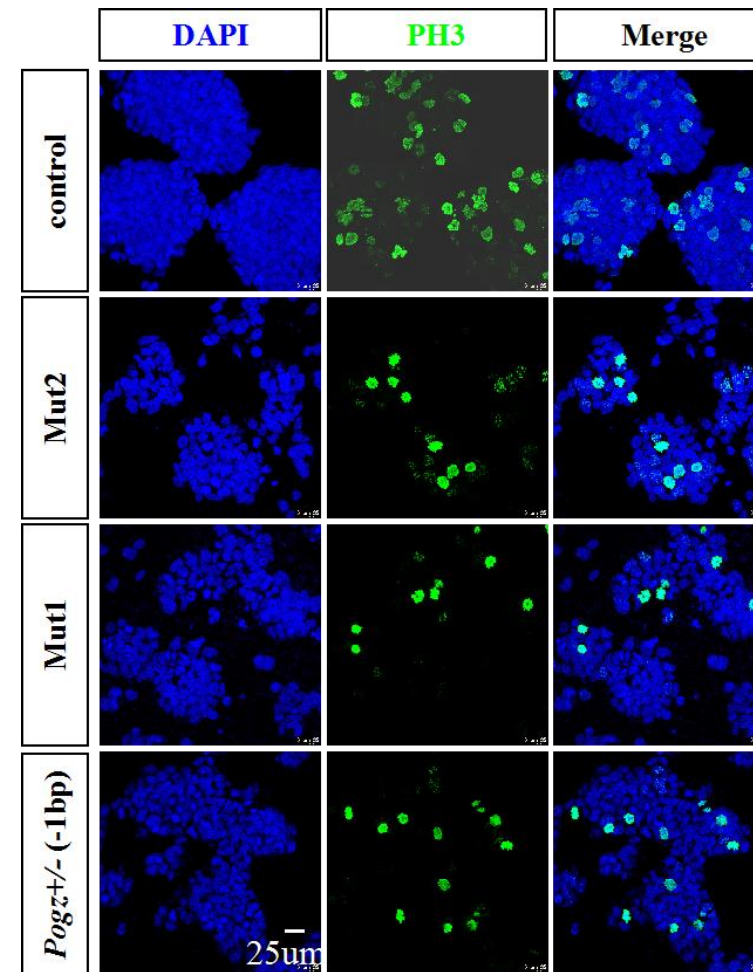

**C**

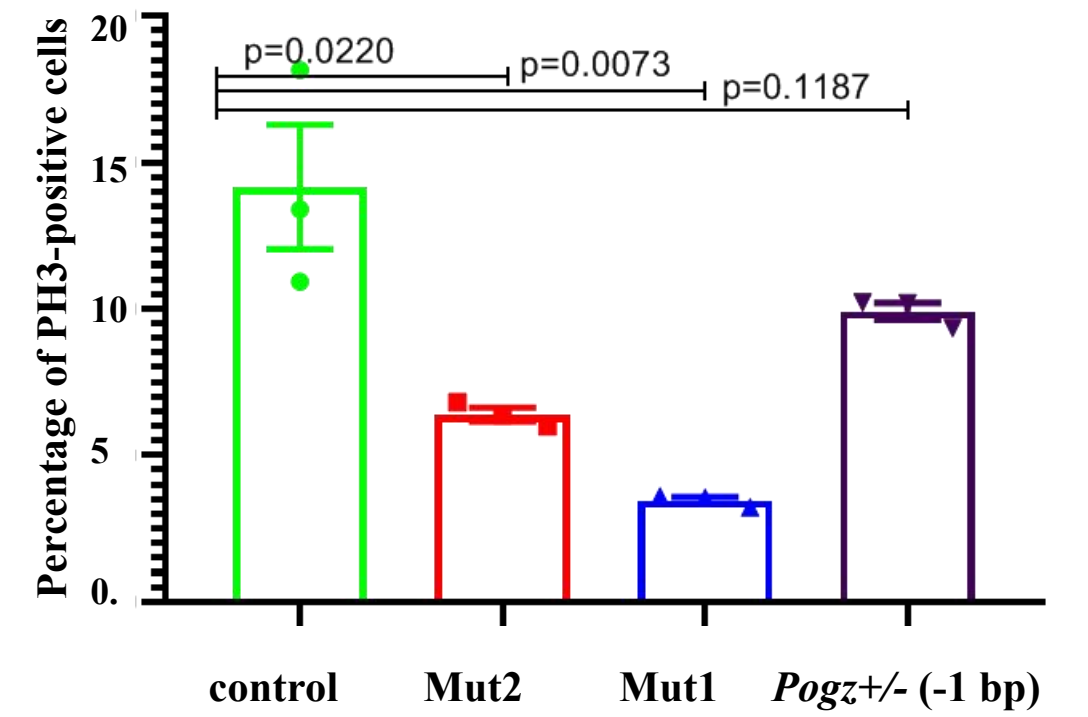

**D**

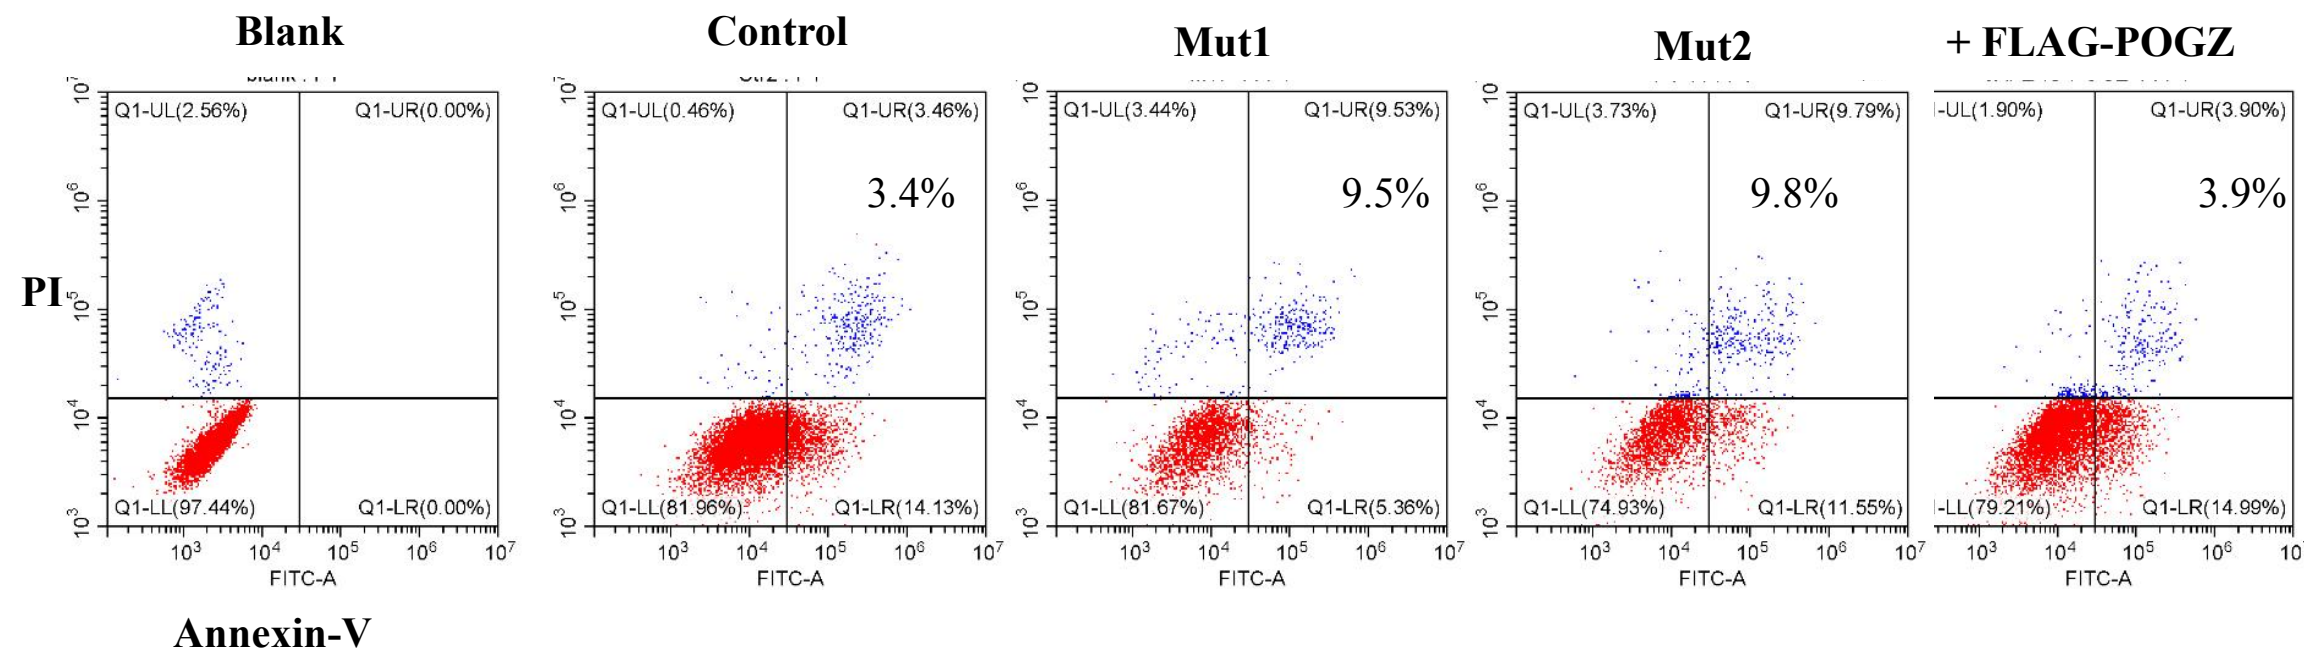

**E**

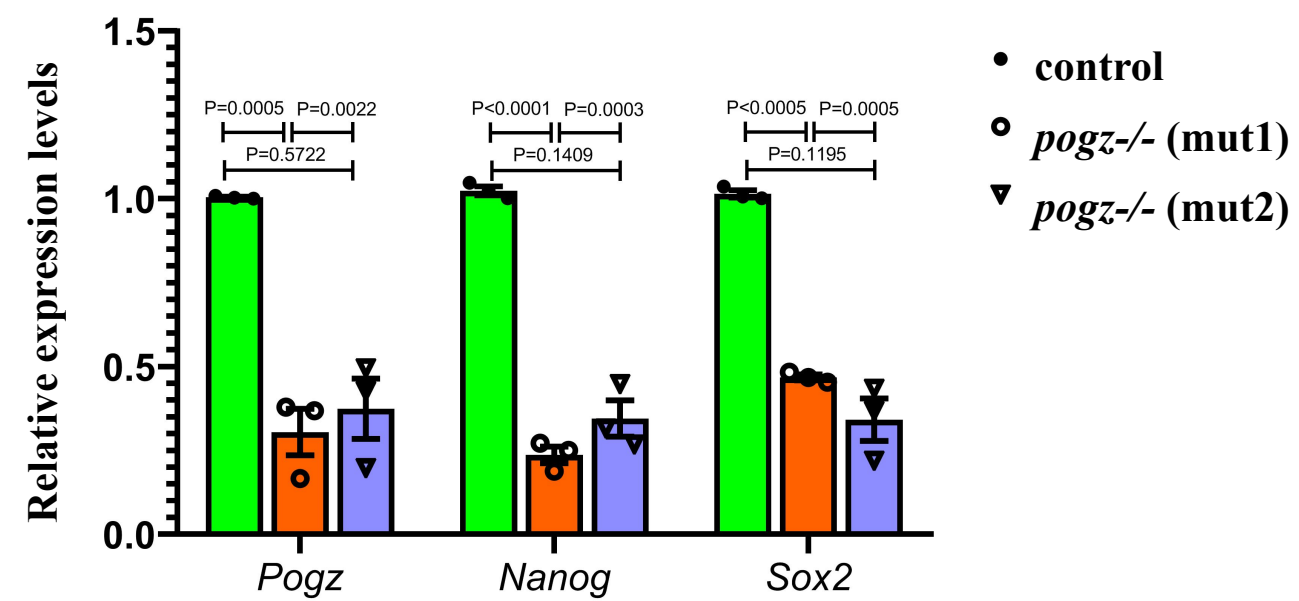

**F**

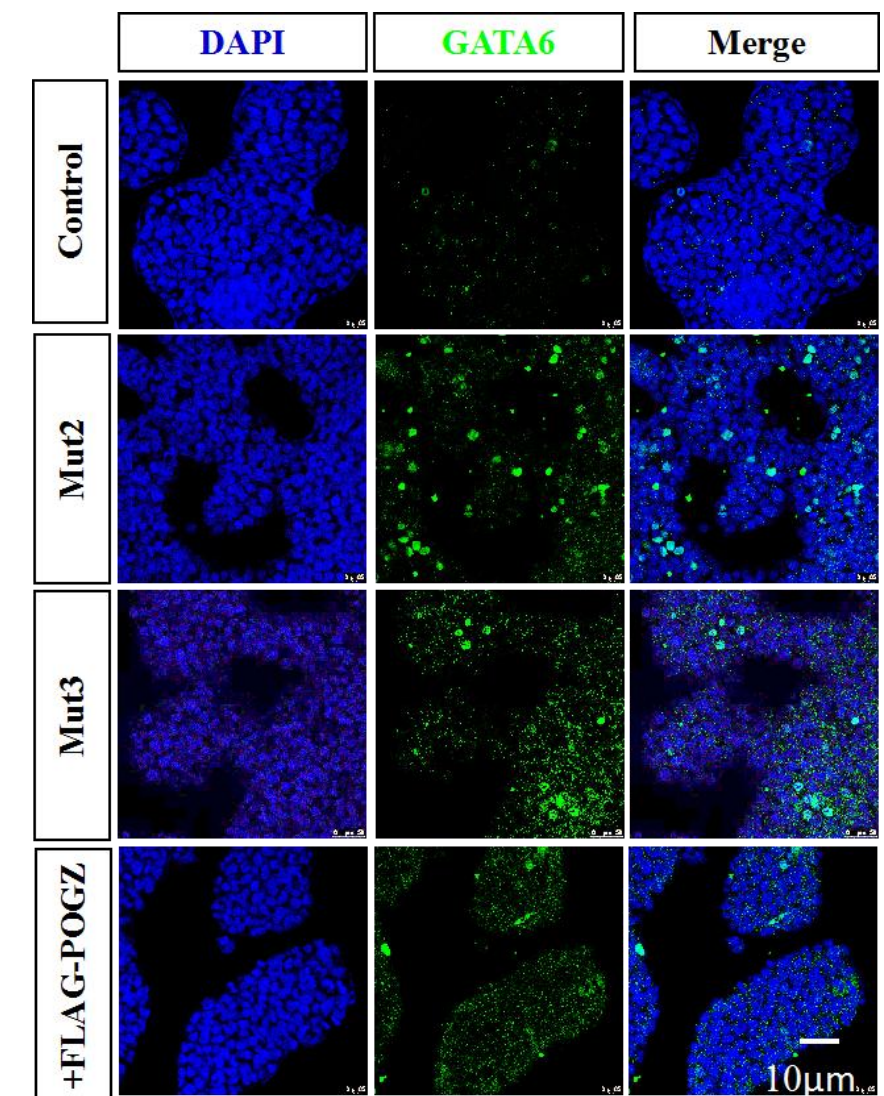

Supplementary Figure 2

**A**

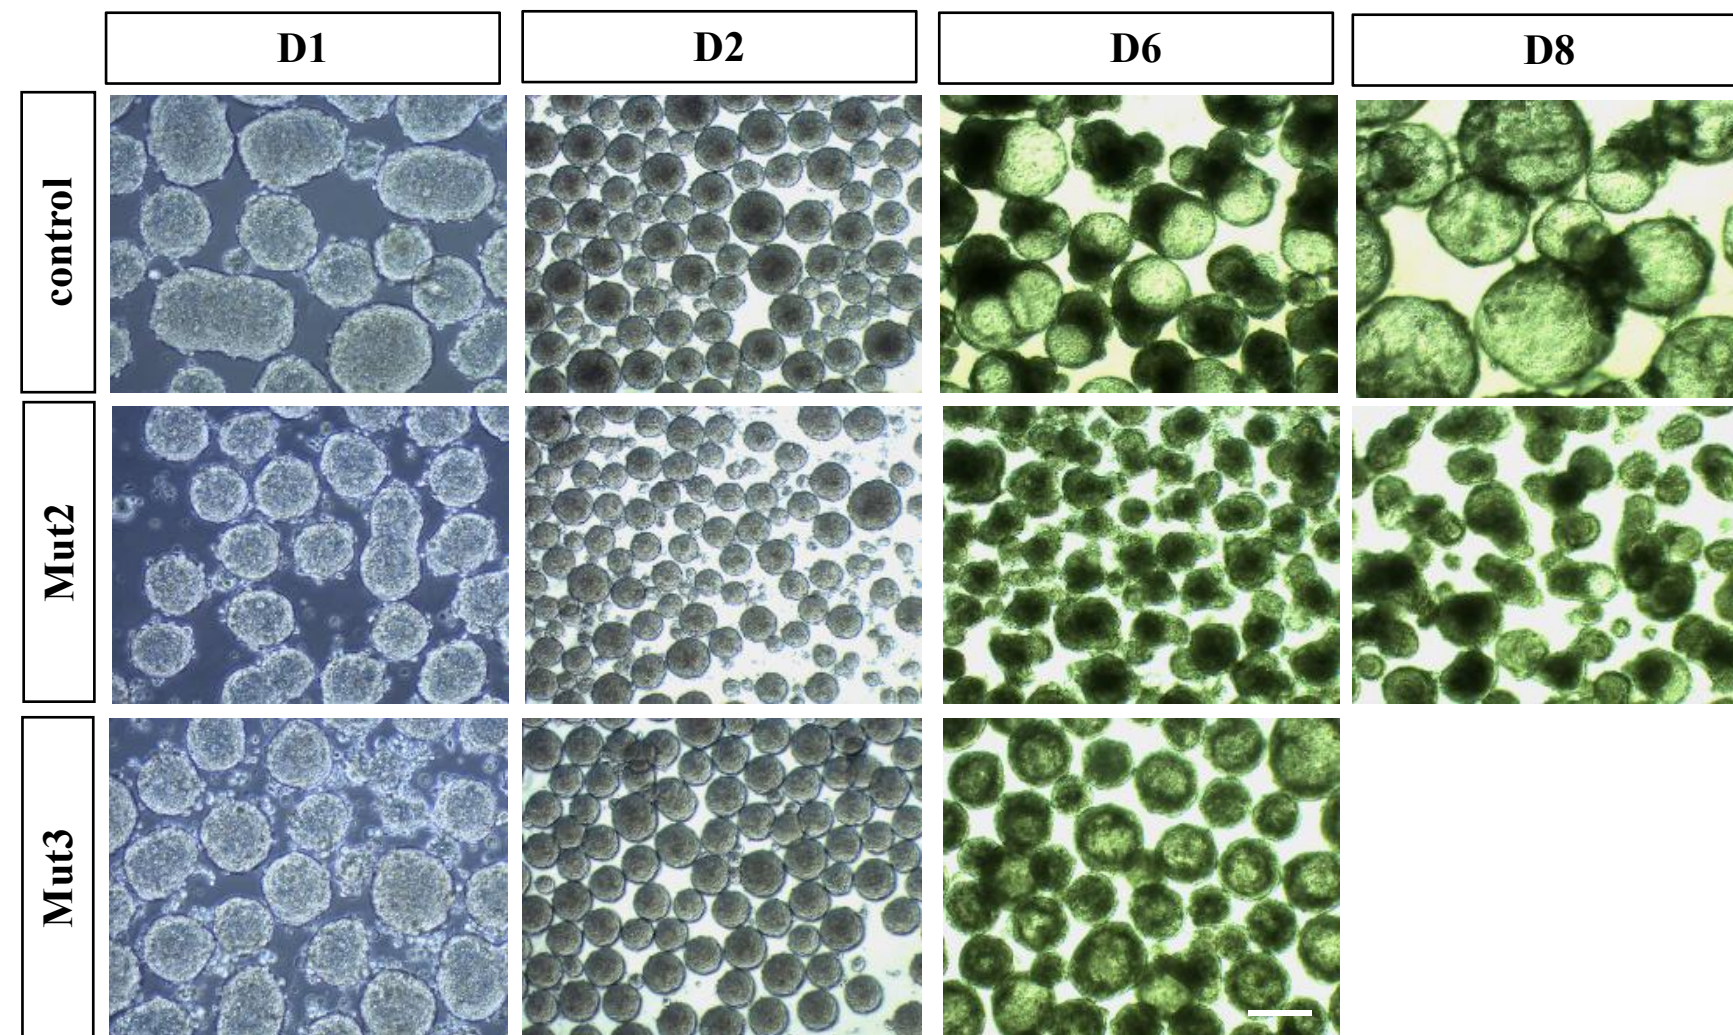

**B**

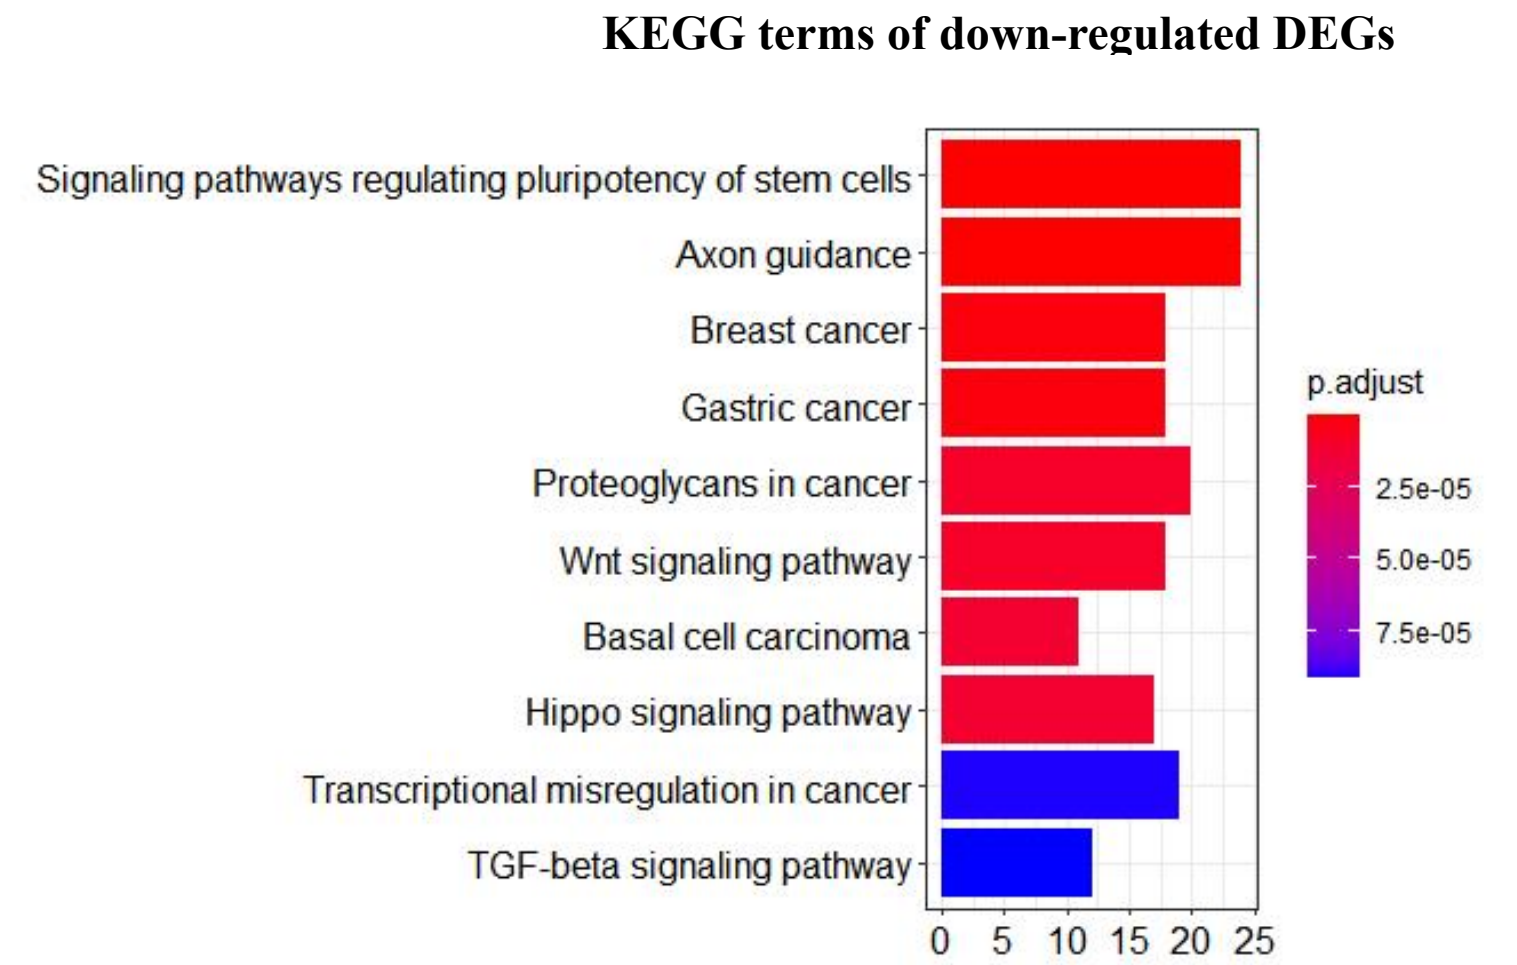

**C**

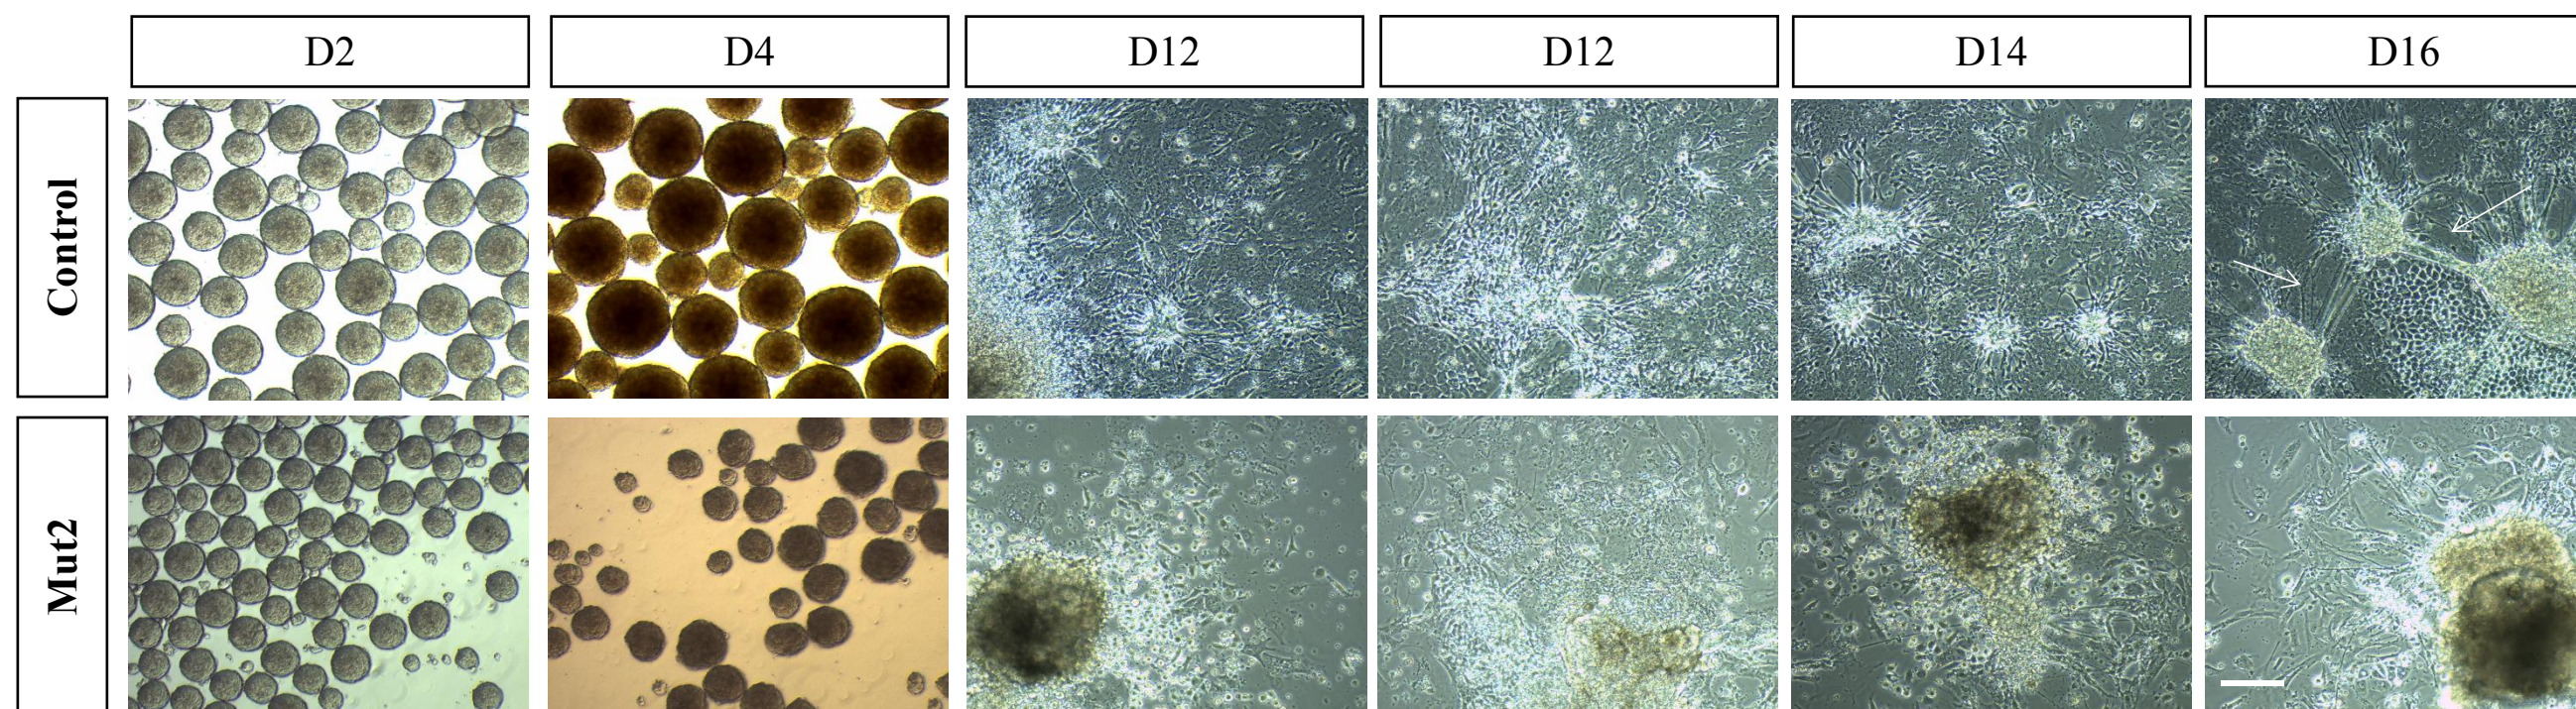

### Supplementary Figure 3

**A**

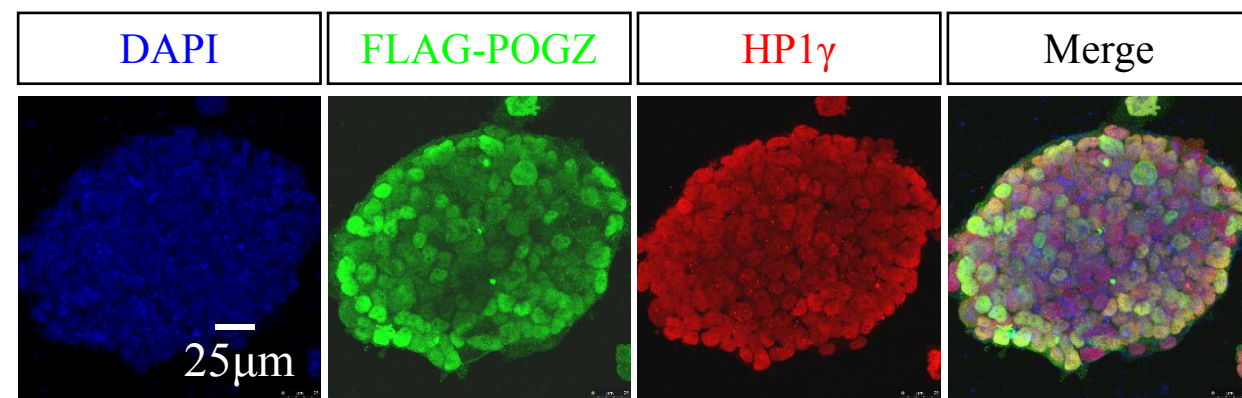

**B**

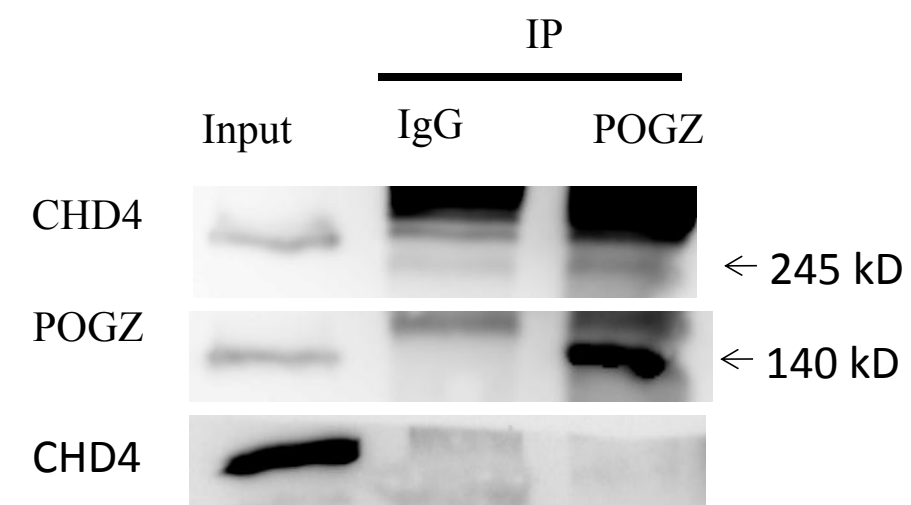

**C**

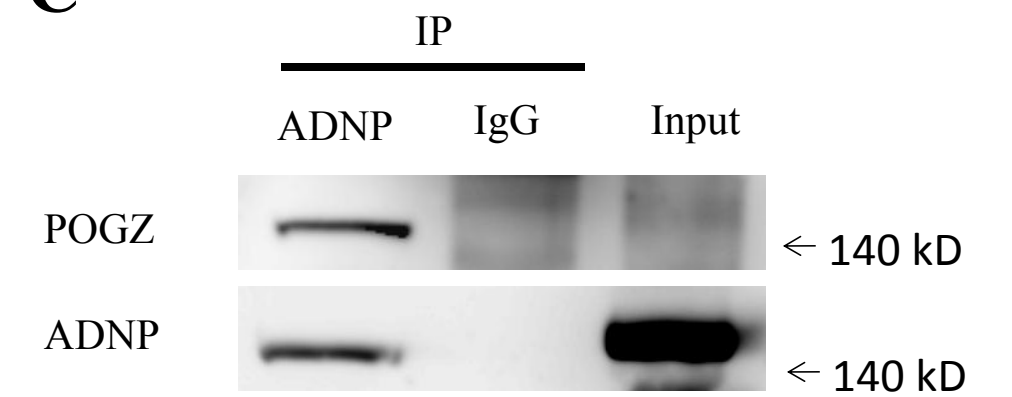

**D**

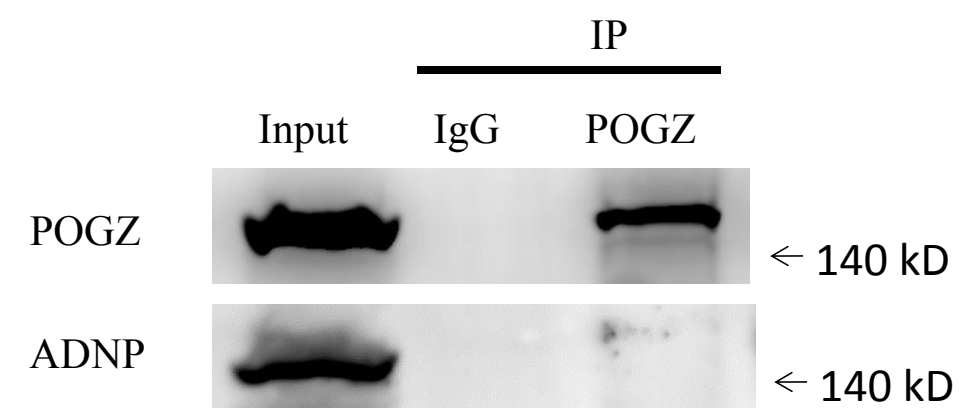

**E**

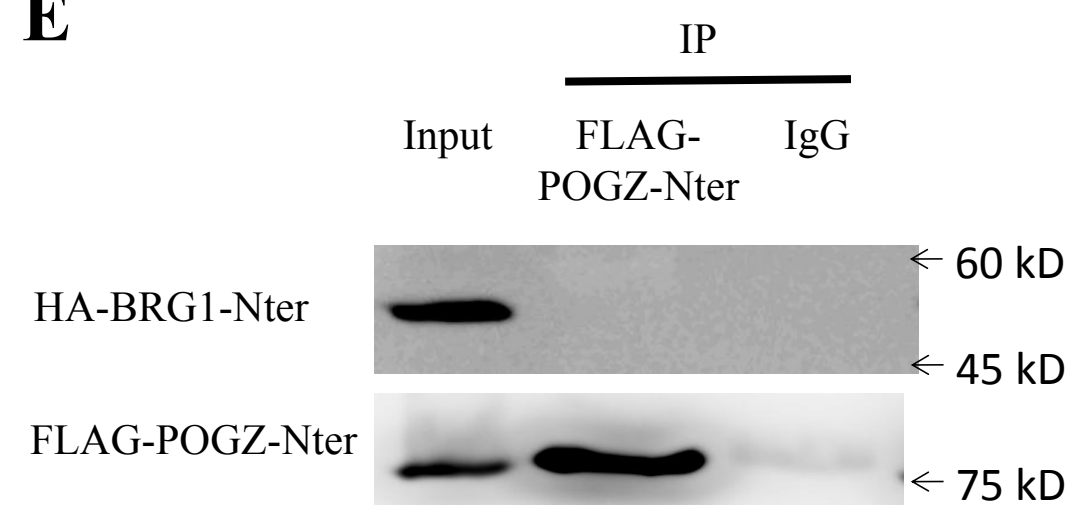

**F**

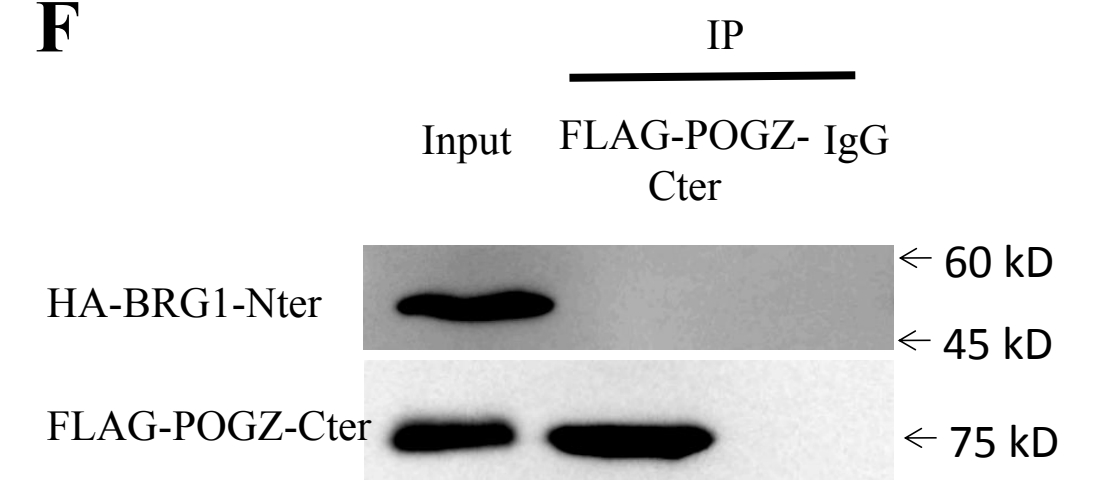

**G**

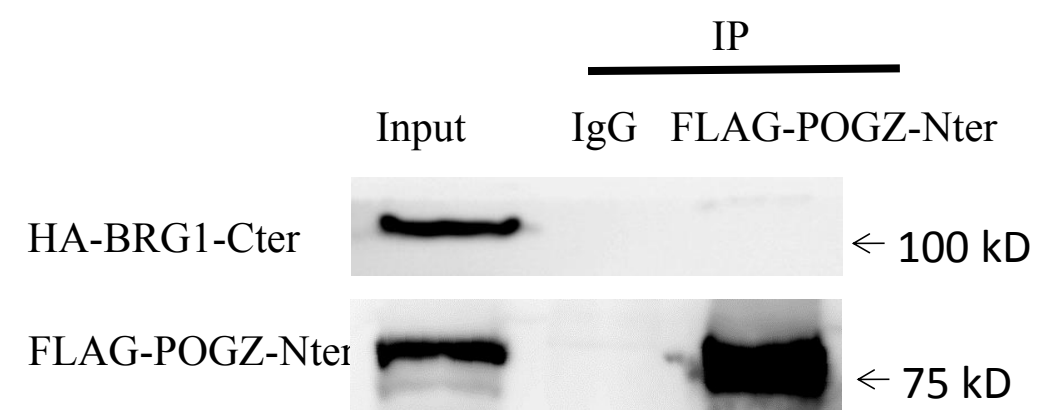

**H**

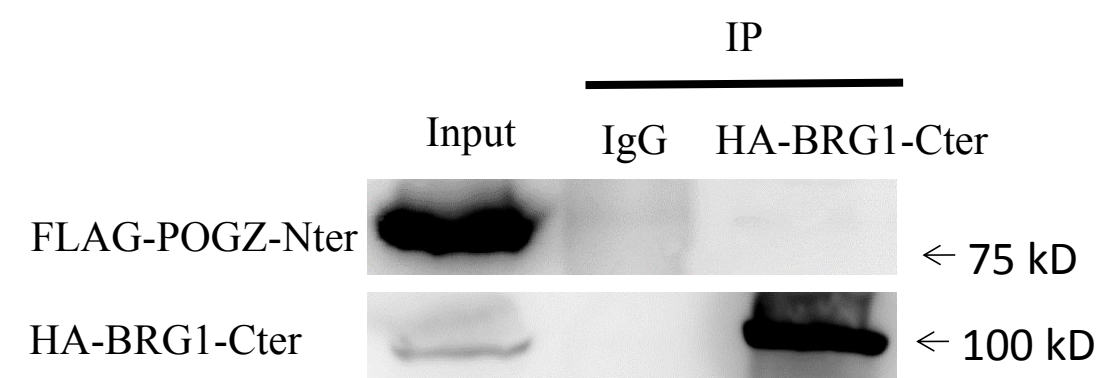

**I**

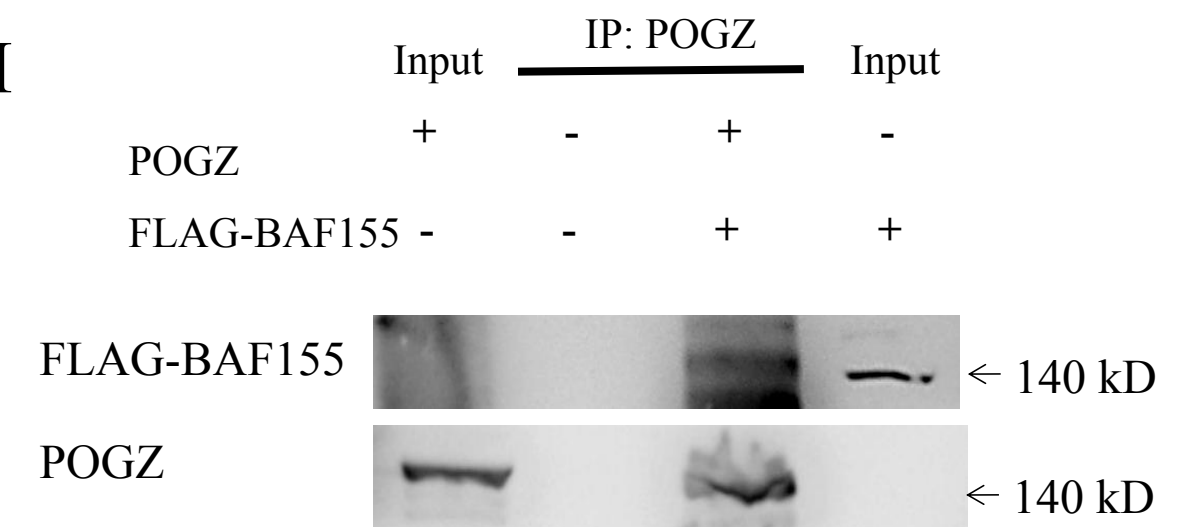

# Supplementary Figure 4

**A**

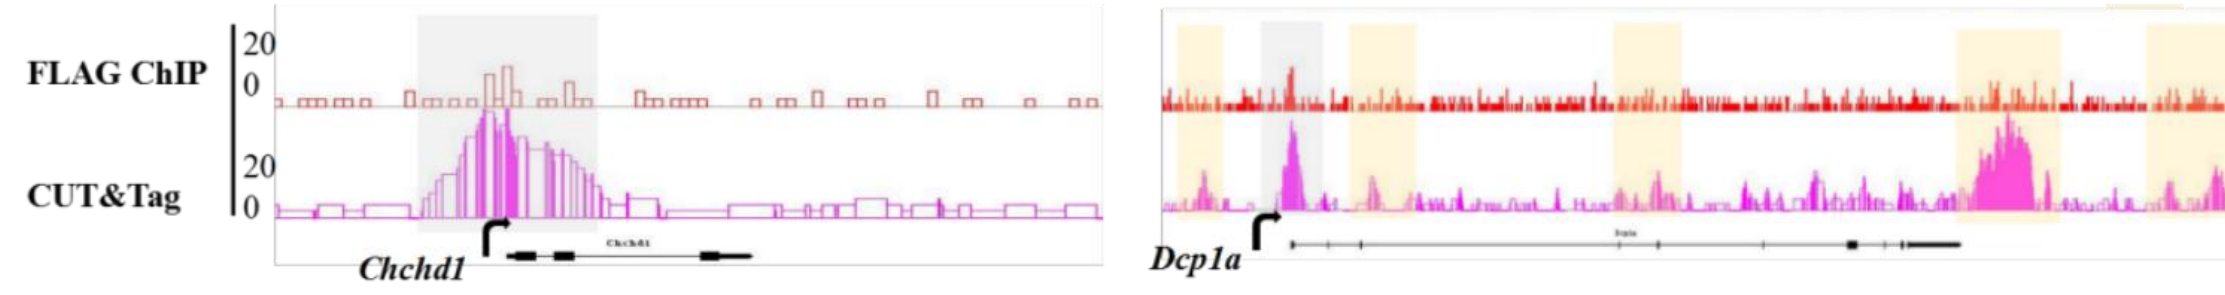

**B**

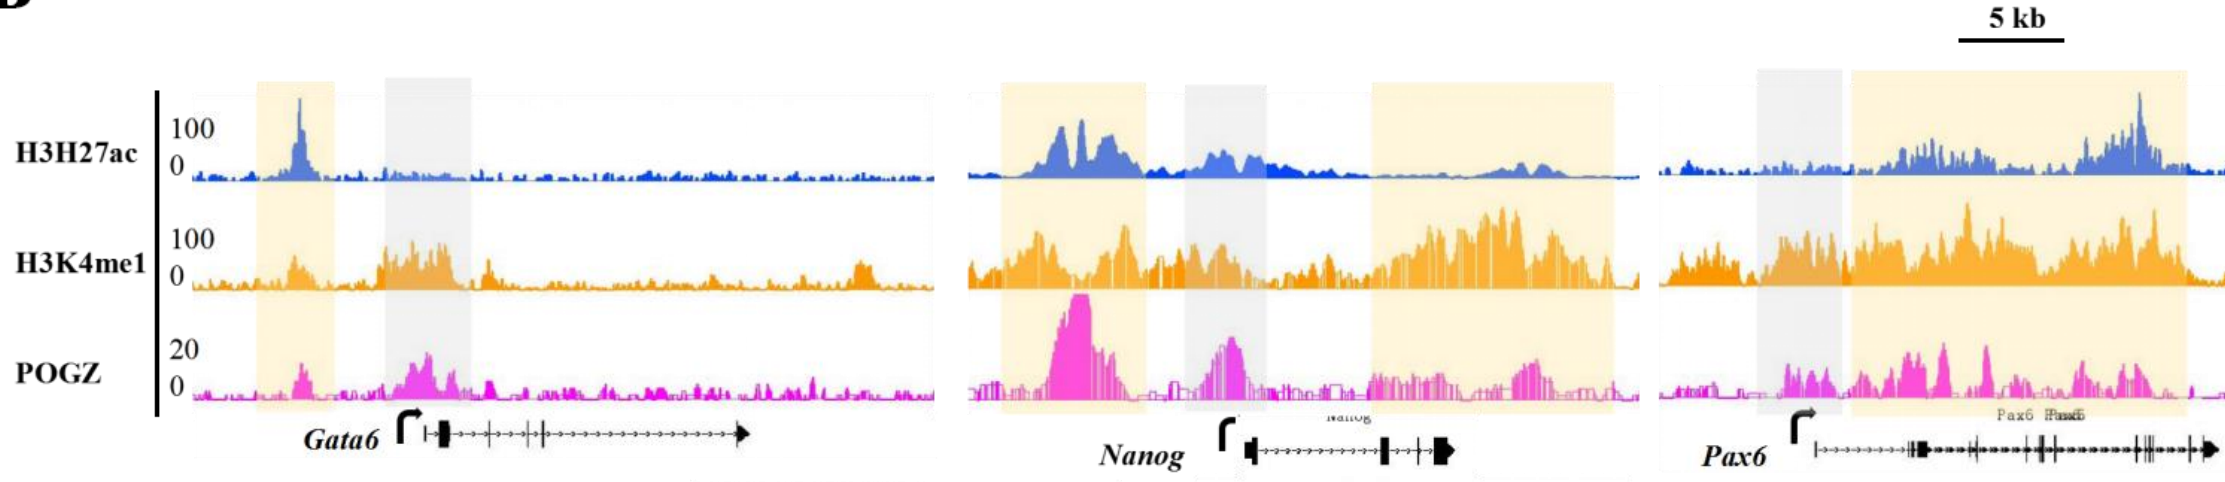

**D**

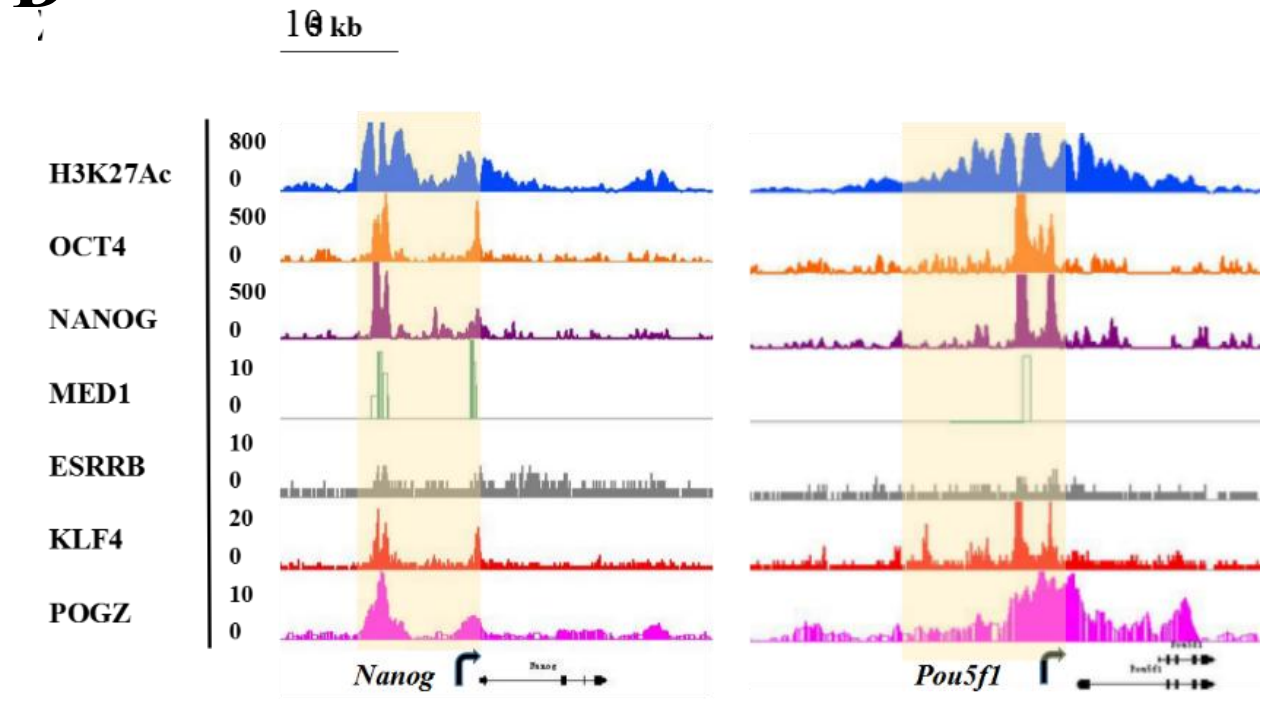

**C**

| Rank | Motif | Name                                                                    | P-value | log P-value | q-value (Benjamini) | # Target Sequences with Motif | % of Targets Sequences with Motif | # Background Sequences with Motif | % of Background Sequences with Motif |
|------|-------|-------------------------------------------------------------------------|---------|-------------|---------------------|-------------------------------|-----------------------------------|-----------------------------------|--------------------------------------|
| 1    |       | KLF1(Zf)/HUDEP2-KLF1-CutnRun(GSE136251)/Homer                           | 1e-508  | -1.170e+03  | 0.0000              | 4845.0                        | 28.96%                            | 4504.4                            | 14.42%                               |
| 2    |       | Sp2(Zf)/HEK293-Sp2.eGFP-ChIP-Seq(Encode)/Homer                          | 1e-421  | -9.706e+02  | 0.0000              | 6418.0                        | 38.37%                            | 7233.7                            | 23.16%                               |
| 3    |       | KLF3(Zf)/MEF-Klf3-ChIP-Seq(GSE44748)/Homer                              | 1e-412  | -9.506e+02  | 0.0000              | 3127.0                        | 18.69%                            | 2534.2                            | 8.11%                                |
| 4    |       | Sp5(Zf)/mES-Sp5.Flag-ChIP-Seq(GSE72989)/Homer                           | 1e-407  | -9.379e+02  | 0.0000              | 5089.0                        | 30.42%                            | 5261.8                            | 16.85%                               |
| 5    |       | KLF5(Zf)/LoVo-KLF5-ChIP-Seq(GSE49402)/Homer                             | 1e-368  | -8.494e+02  | 0.0000              | 5599.0                        | 33.47%                            | 6216.1                            | 19.90%                               |
| 6    |       | Sp1(Zf)/Promoter/Homer                                                  | 1e-318  | -7.336e+02  | 0.0000              | 2425.0                        | 14.50%                            | 1944.6                            | 6.23%                                |
| 7    |       | Klf4(Zf)/mES-Klf4-ChIP-Seq(GSE11431)/Homer                              | 1e-271  | -6.244e+02  | 0.0000              | 1976.0                        | 11.81%                            | 1537.7                            | 4.92%                                |
| 8    |       | KLF14(Zf)/HEK293-KLF14.GFP-ChIP-Seq(GSE58341)/Homer                     | 1e-249  | -5.743e+02  | 0.0000              | 6685.0                        | 39.96%                            | 8693.9                            | 27.83%                               |
| 9    |       | Klf9(Zf)/GBM-Klf9-ChIP-Seq(GSE62211)/Homer                              | 1e-239  | -5.505e+02  | 0.0000              | 2343.0                        | 14.01%                            | 2106.4                            | 6.74%                                |
| 10   |       | KLF6(Zf)/PDAC-KLF6-ChIP-Seq(GSE64557)/Homer                             | 1e-238  | -5.489e+02  | 0.0000              | 4523.0                        | 27.04%                            | 5260.6                            | 16.84%                               |
| 11   |       | Ronin(THAP)/ES-Thap11-ChIP-Seq(GSE51522)/Homer                          | 1e-149  | -3.437e+02  | 0.0000              | 267.0                         | 1.60%                             | 58.5                              | 0.19%                                |
| 12   |       | Elk4(ETS)/Hela-Elk4-ChIP-Seq(GSE31477)/Homer                            | 1e-148  | -3.425e+02  | 0.0000              | 2240.0                        | 13.39%                            | 2357.7                            | 7.55%                                |
| 13   |       | KLF10(Zf)/HEK293-KLF10.GFP-ChIP-Seq(GSE58341)/Homer                     | 1e-134  | -3.093e+02  | 0.0000              | 2261.0                        | 13.52%                            | 2464.8                            | 7.89%                                |
| 14   |       | EKLF(Zf)/Erythrocyte-Klf1-ChIP-Seq(GSE20478)/Homer                      | 1e-124  | -2.869e+02  | 0.0000              | 820.0                         | 4.90%                             | 593.4                             | 1.90%                                |
| 15   |       | GFY-Staf(?Zf)/Promoter/Homer                                            | 1e-115  | -2.662e+02  | 0.0000              | 323.0                         | 1.93%                             | 121.5                             | 0.39%                                |
| 16   |       | SUT1?/SacCer-Promoters/Homer                                            | 1e-114  | -2.628e+02  | 0.0000              | 13319.0                       | 79.62%                            | 22478.2                           | 71.97%                               |
| 17   |       | SeqBias: CG bias                                                        | 1e-106  | -2.456e+02  | 0.0000              | 15209.0                       | 90.92%                            | 26628.8                           | 85.26%                               |
| 18   |       | OCT4-SOX2-TCF-NANOG(POU,Homeobox,HMG)/mES-Oct4-ChIP-Seq(GSE11431)/Homer | 1e-105  | -2.424e+02  | 0.0000              | 505.0                         | 3.02%                             | 299.6                             | 0.96%                                |
| 19   |       | ELF1(ETS)/Jurkat-ELF1-ChIP-Seq(SRA014231)/Homer                         | 1e-100  | -2.309e+02  | 0.0000              | 1967.0                        | 11.76%                            | 2233.8                            | 7.15%                                |
| 20   |       | Maz(Zf)/HepG2-Maz-ChIP-Seq(GSE31477)/Homer                              | 1e-100  | -2.303e+02  | 0.0000              | 4972.0                        | 29.72%                            | 7062.5                            | 22.61%                               |

# Supplementary Figure 5

**A**

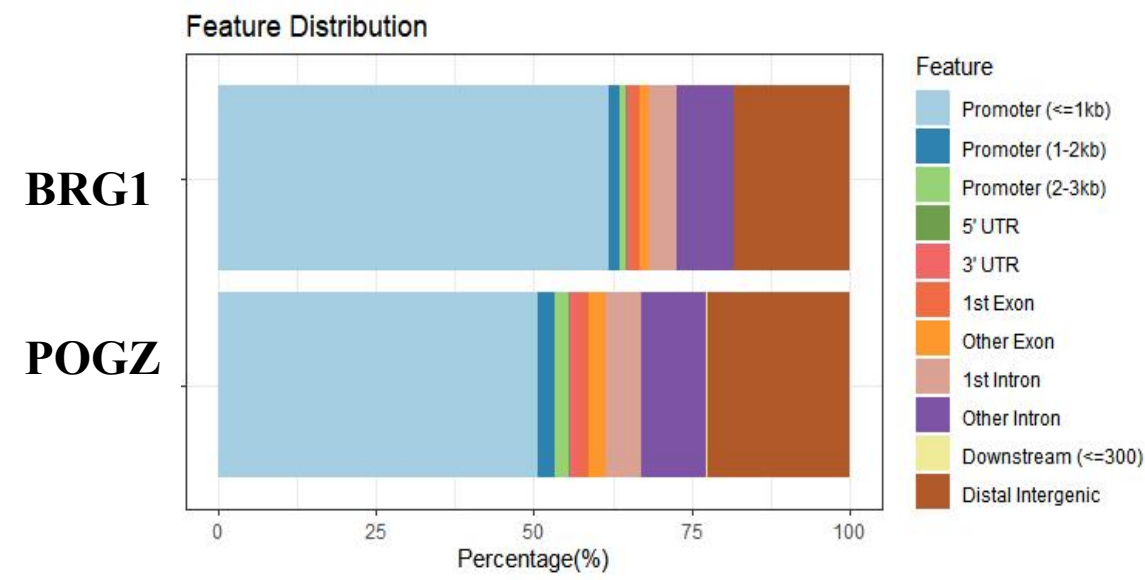

**B**

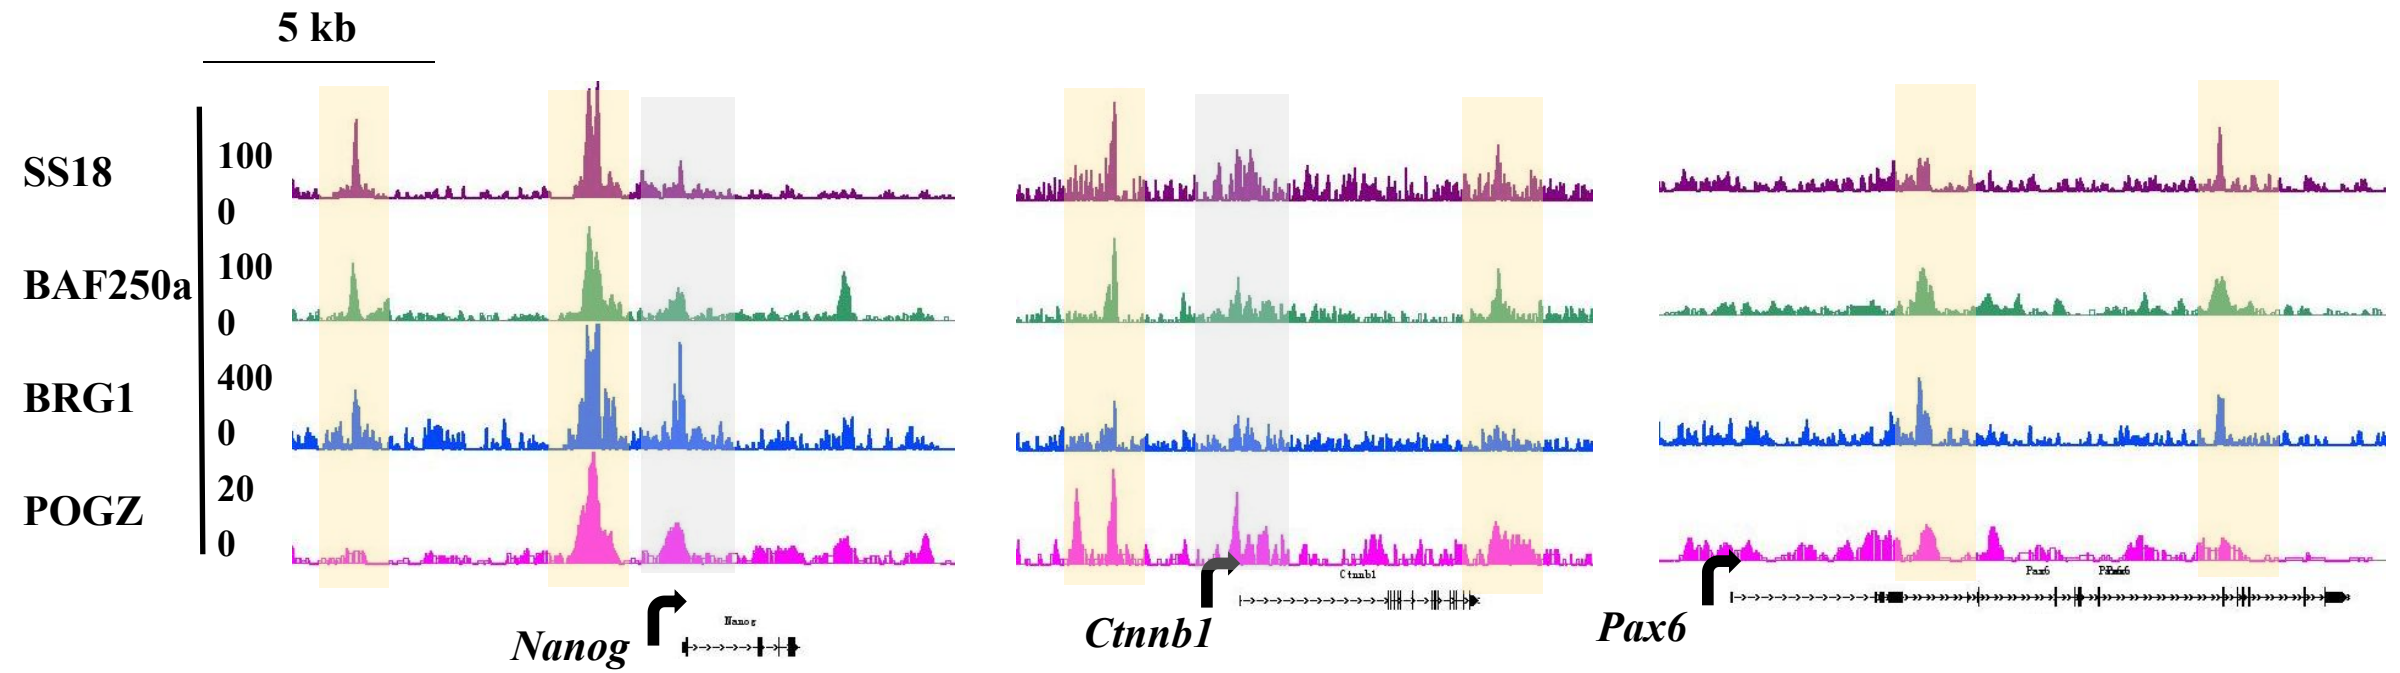

**C**

## GO of BRG1+POGZ<sup>-</sup> genes

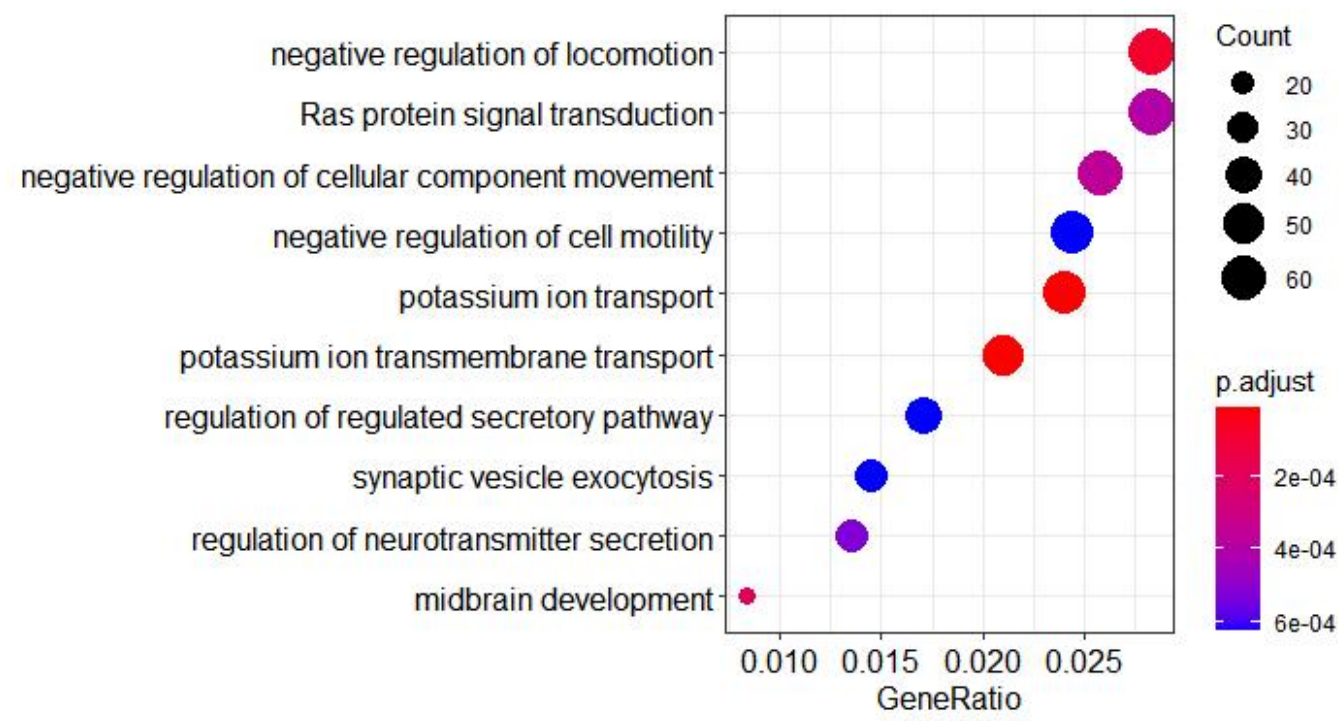

## KEGG of BRG1+POGZ<sup>-</sup> genes

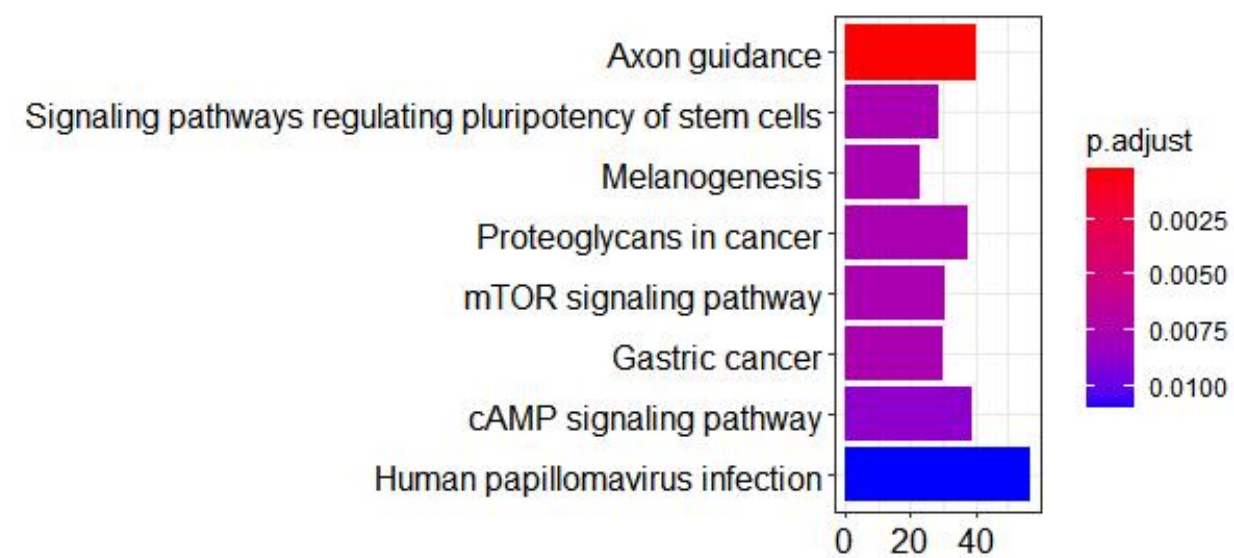

**D**

## GO of BRG1-POGZ<sup>+</sup> genes

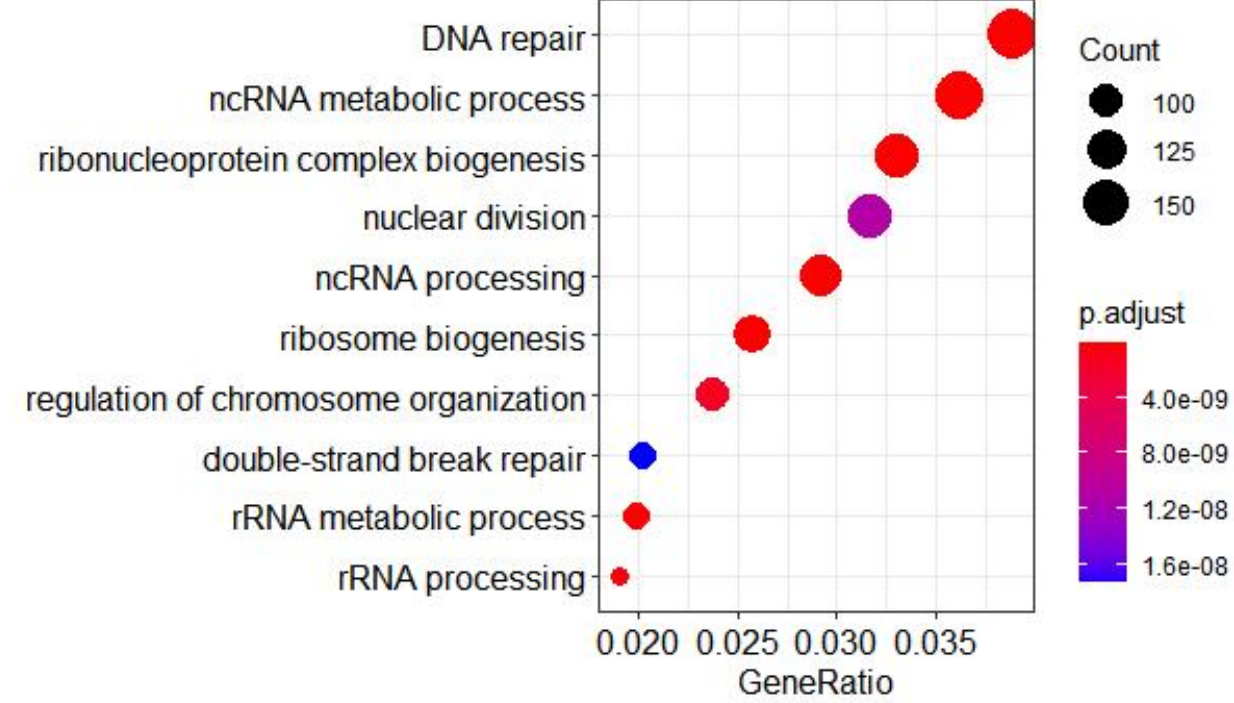

## KEGG of BRG1-POGZ<sup>+</sup> genes

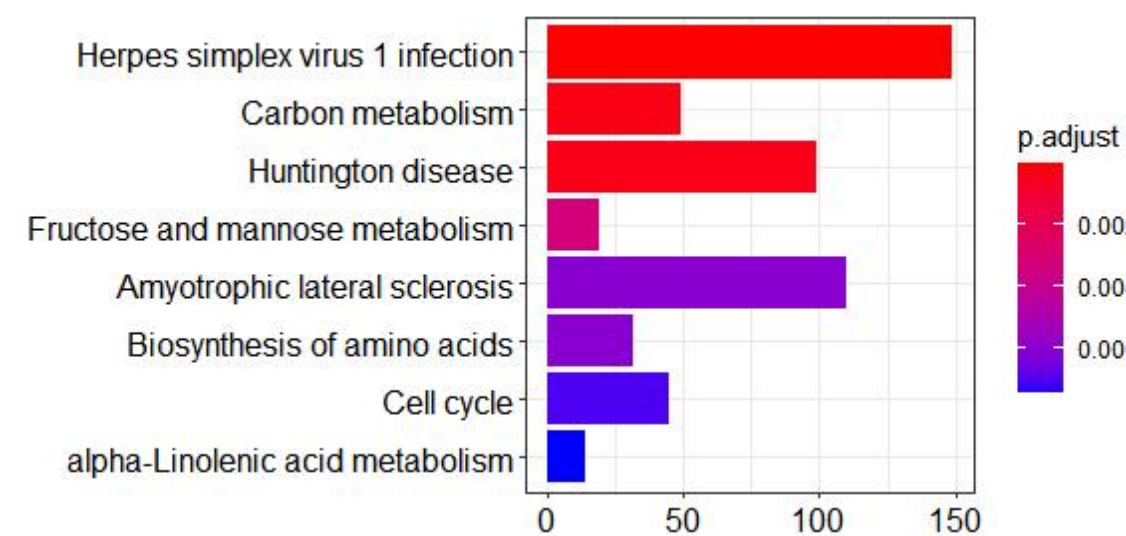

**E**

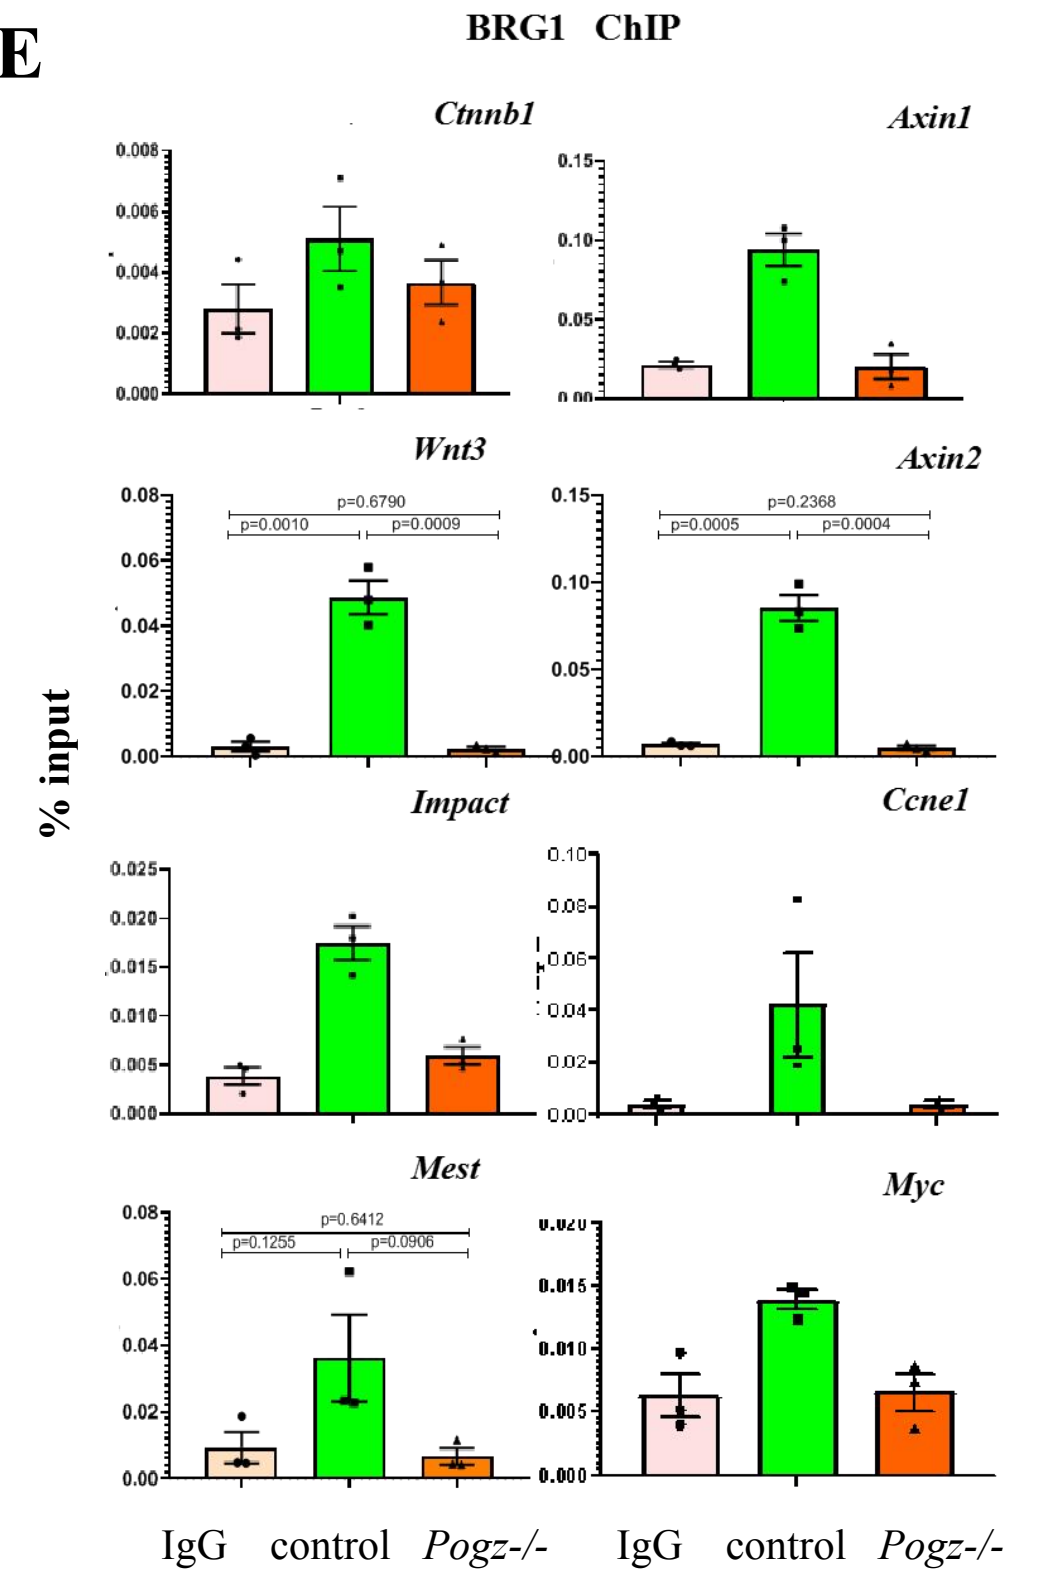

# Supplementary Figure 6

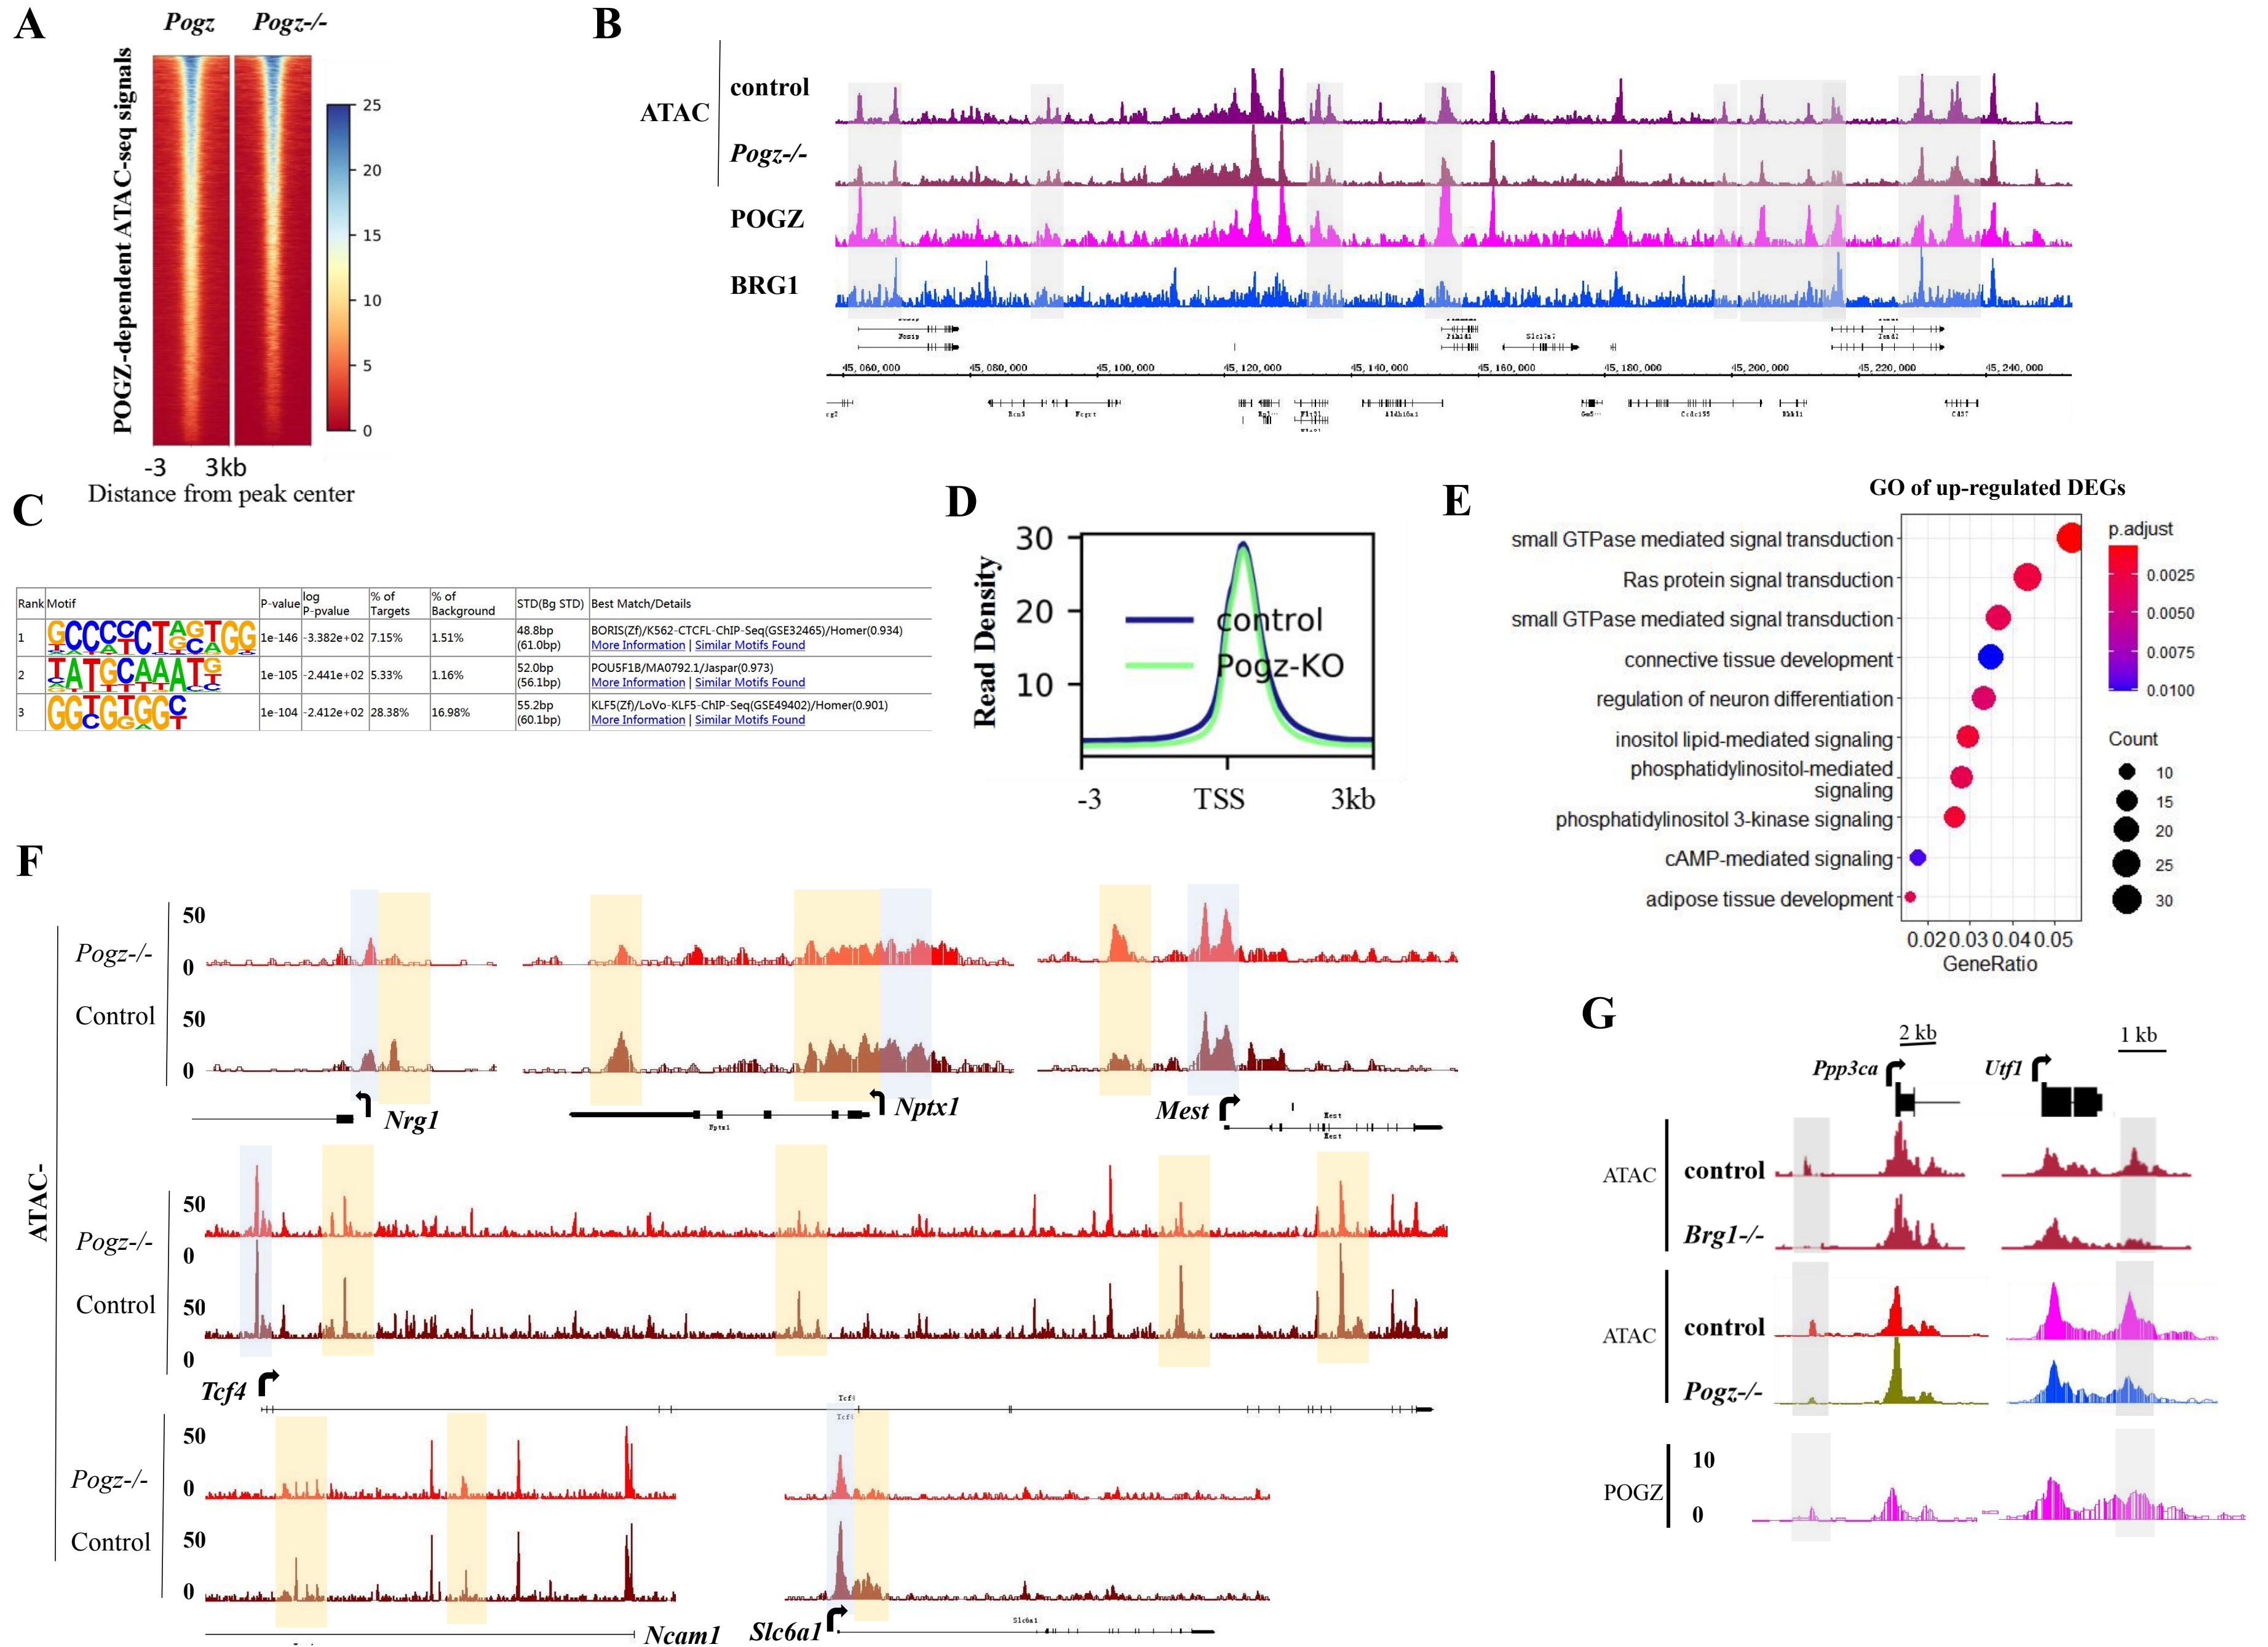

# Supplementary Figure 7

**A**

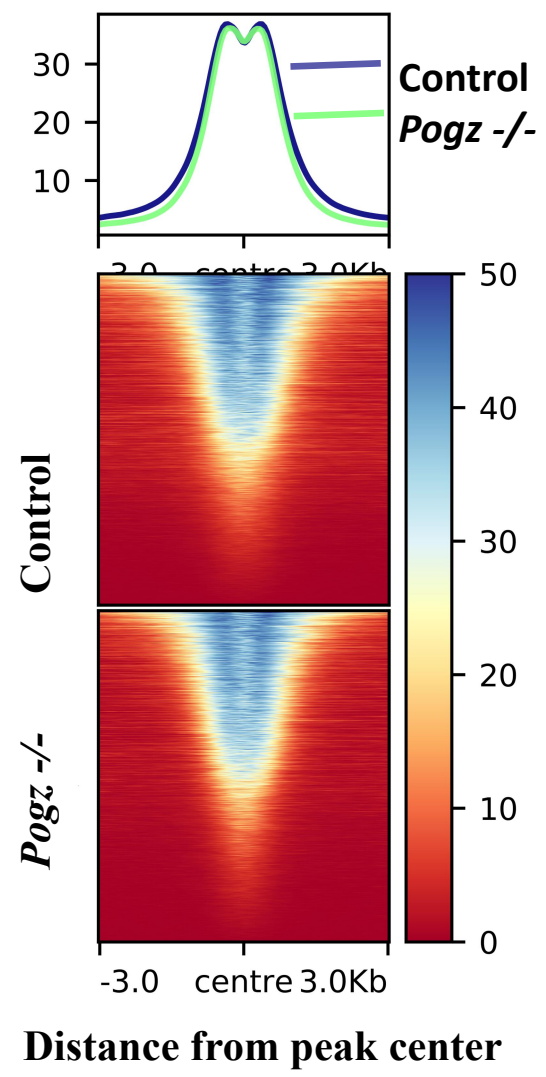

**B**

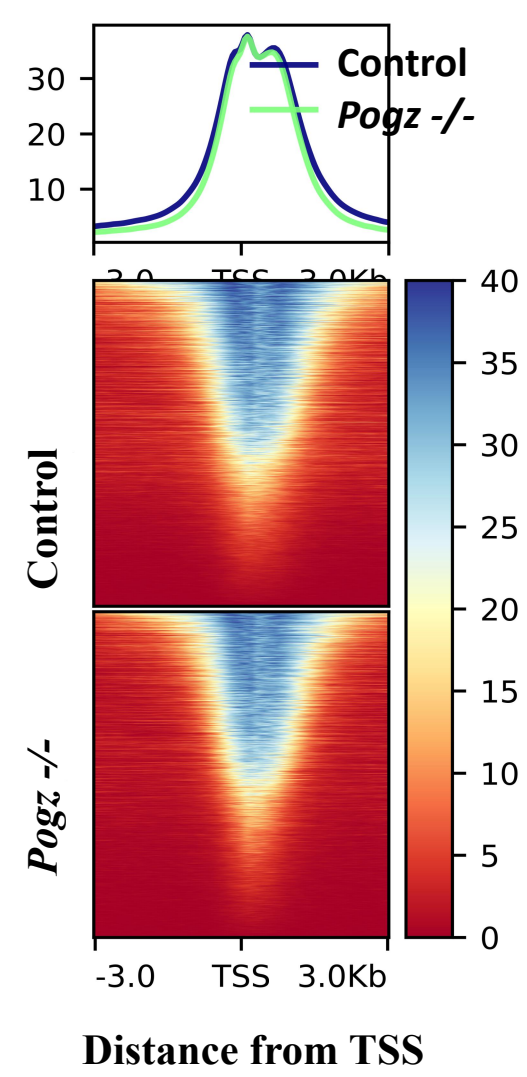

**D**

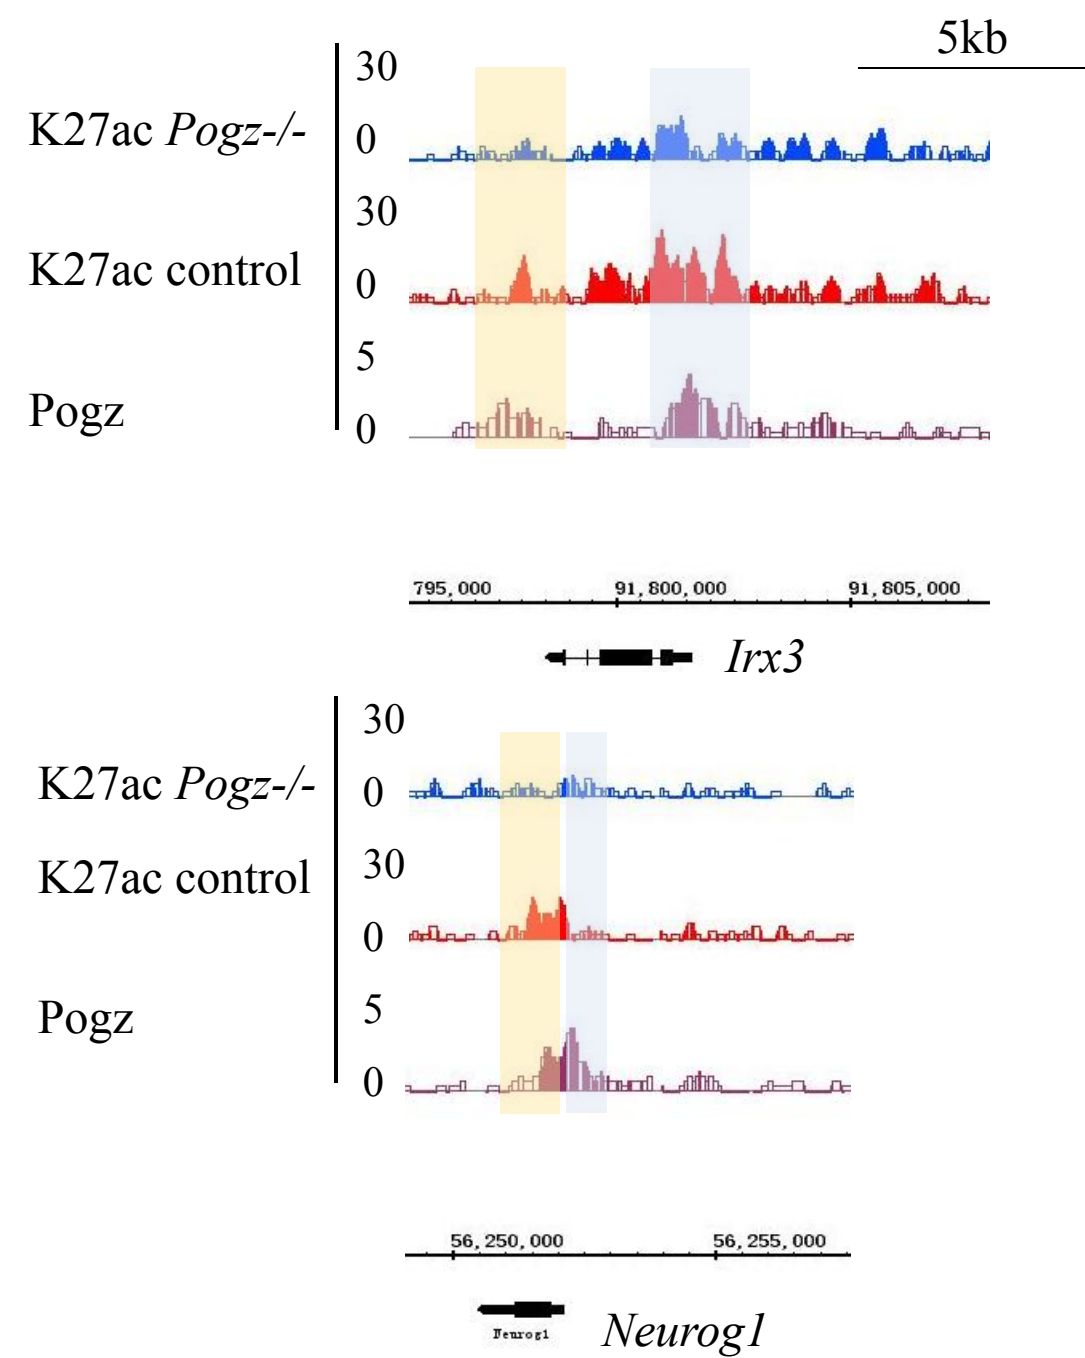

**C**

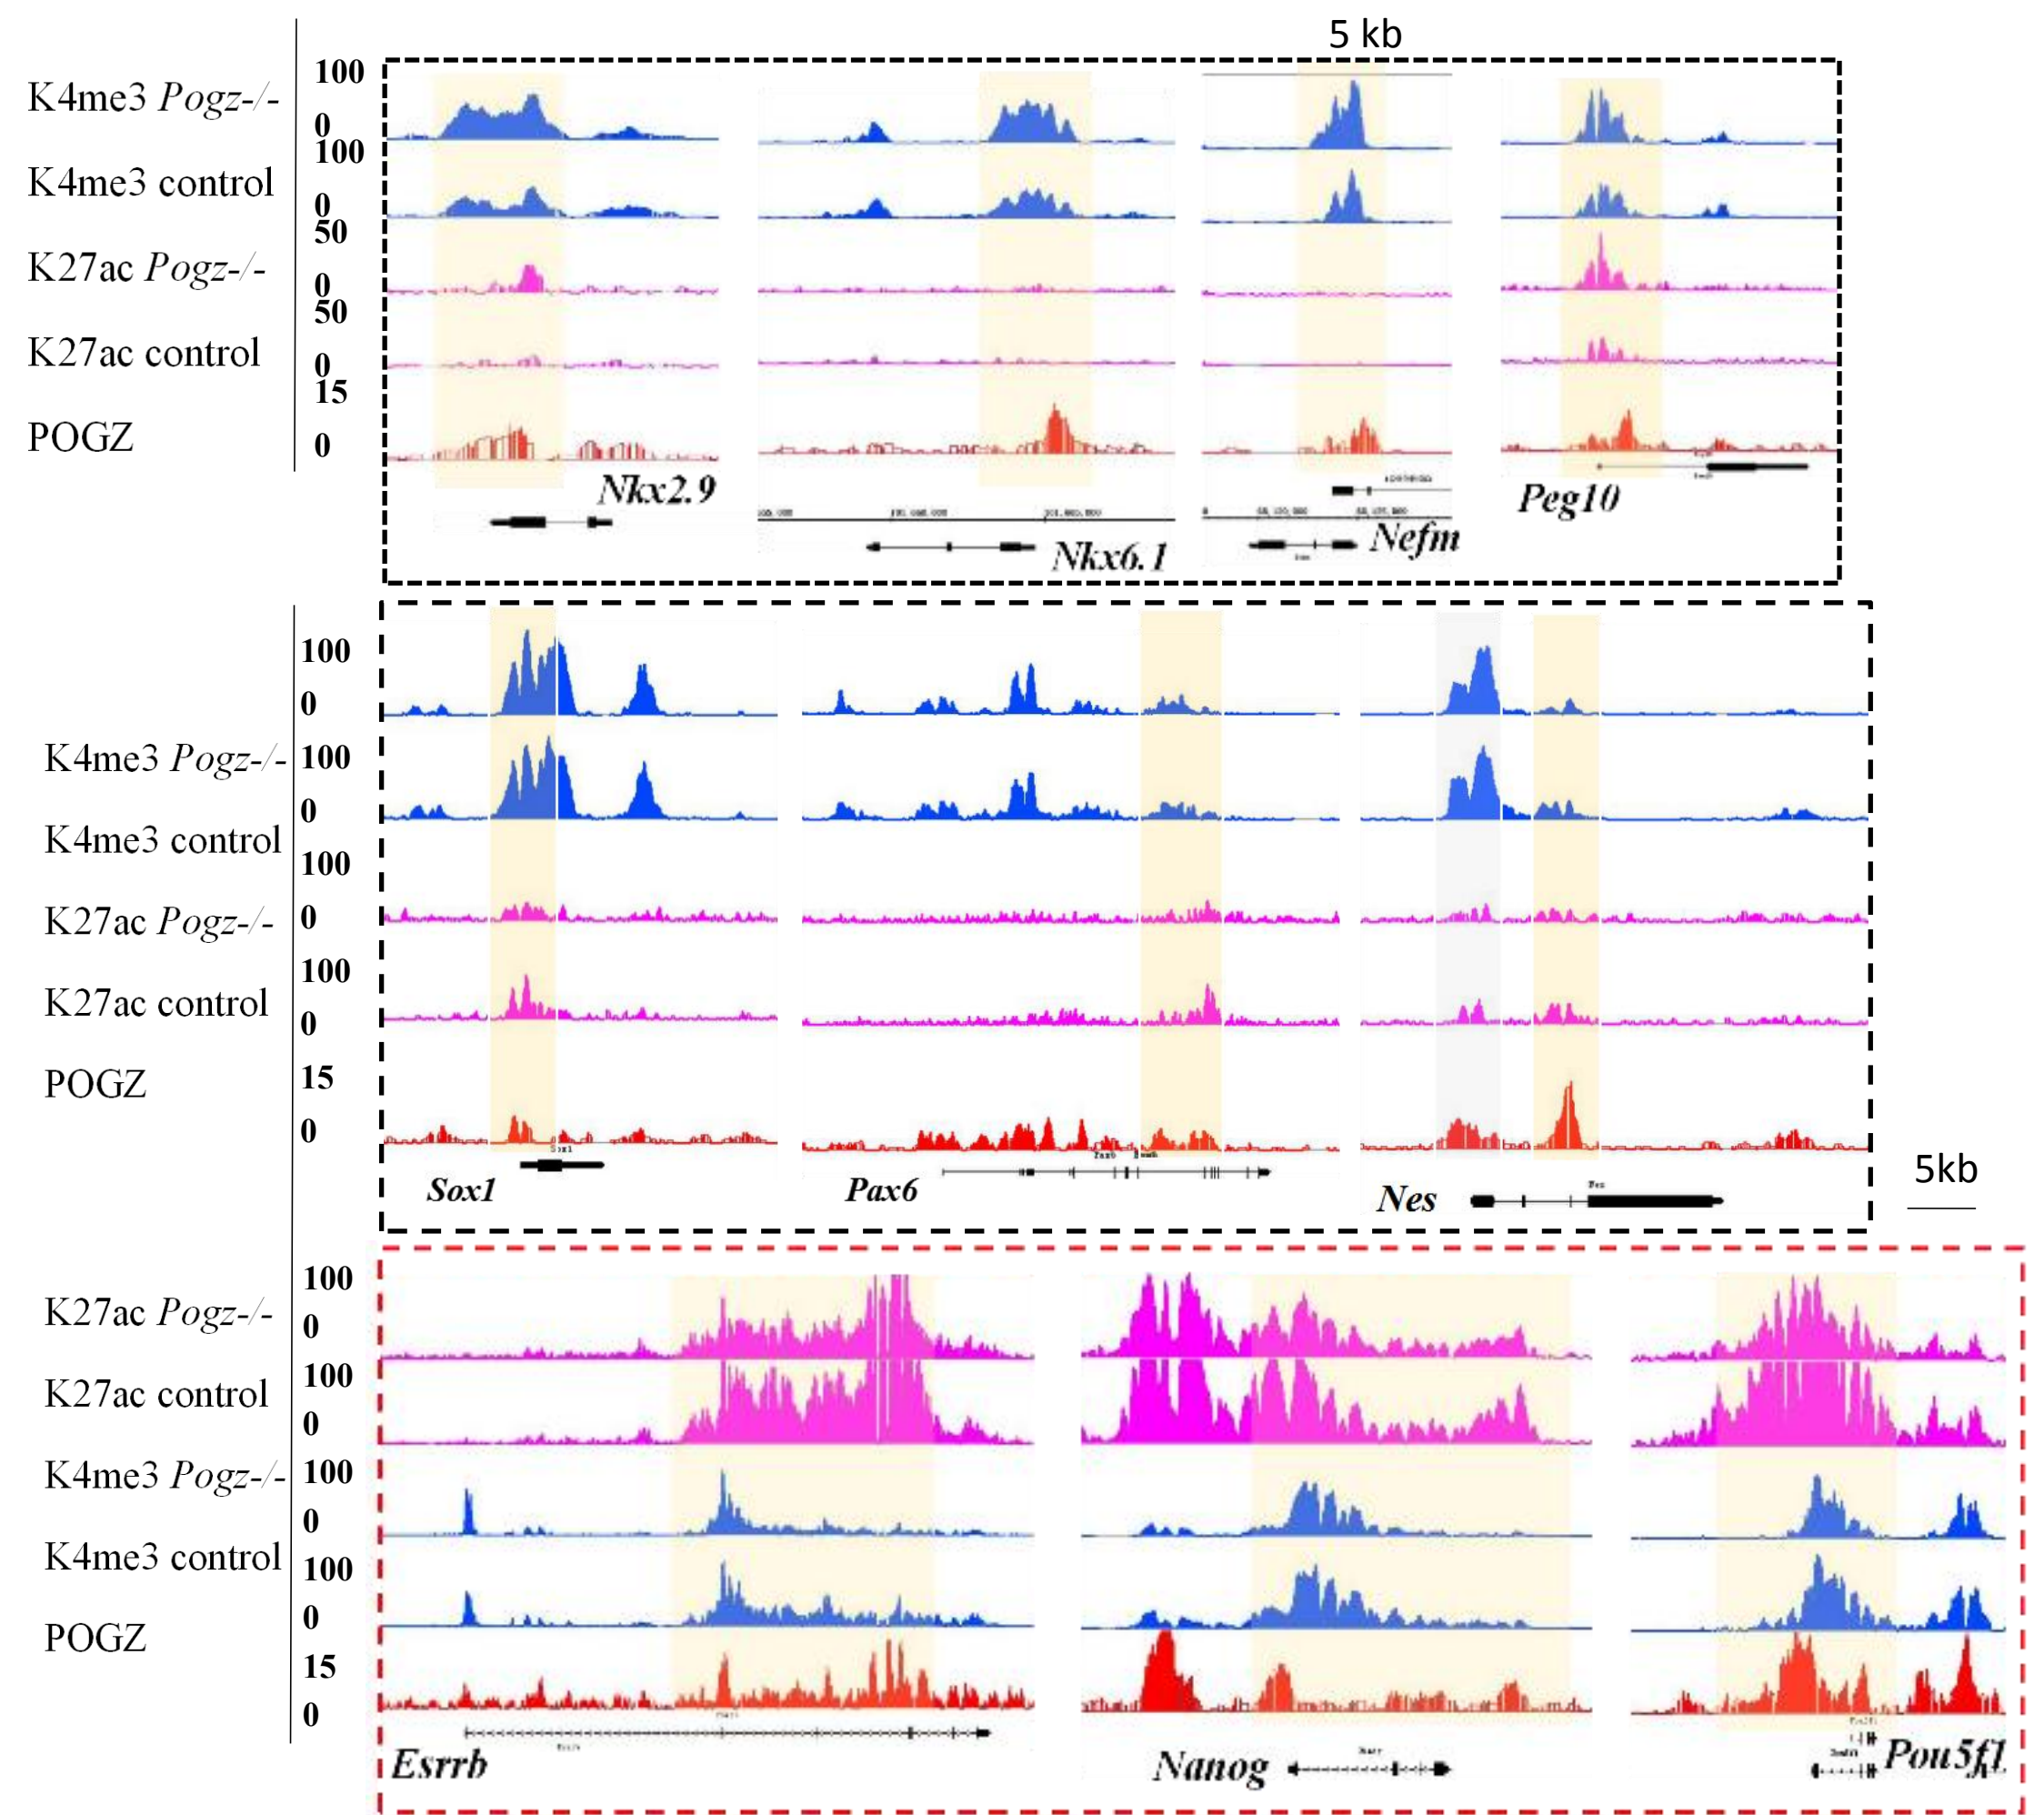

Supplement: 13229_2022_502_MOESM1_ESM.pdf [file 13229_2022_502_MOESM1_ESM.pdf]
